# Supplementary material for: Avian Toll-like receptor allelic diversity far exceeds human polymorphism: an insight from domestic chicken breeds
Source: PubMed Central journal article supplement (PMC6294777; doi:10.1038/s41598-018-36226-1), 2018-12-14
Supplement: 41598_2018_36226_MOESM1_ESM.pdf [file 41598_2018_36226_MOESM1_ESM.pdf]

# Avian Toll-like receptor allelic diversity far exceeds human polymorphism: an insight from domestic chicken breeds

Authors: Zuzana Šwiderská, Adéla Šmídová, Lucie Buchtová, Anna Bryjová, Anežka Fabiánová, Pavel Munclinger, Michal Vinkler

## Content

|                                                                                                            |    |
|------------------------------------------------------------------------------------------------------------|----|
| Supplementary Figures.....                                                                                 | 2  |
| Supplementary Tables.....                                                                                  | 6  |
| Supplementary Methods.....                                                                                 | 26 |
| Genetic analysis of chicken Toll-like receptors ( <i>chTLRs</i> ) and Hypervariable segment I (HVS-I)..... | 26 |
| Genetic analysis of human Toll-like receptors ( <i>hTLRs</i> ) and HVS-I.....                              | 27 |
| Classification of amino acid substitutions.....                                                            | 27 |
| Microsatellites in chickens.....                                                                           | 27 |
| Population structure.....                                                                                  | 28 |
| Supplementary Methods: Figures.....                                                                        | 29 |
| Supplementary Methods: Tables.....                                                                         | 30 |
| References.....                                                                                            | 33 |

## Supplementary Figures

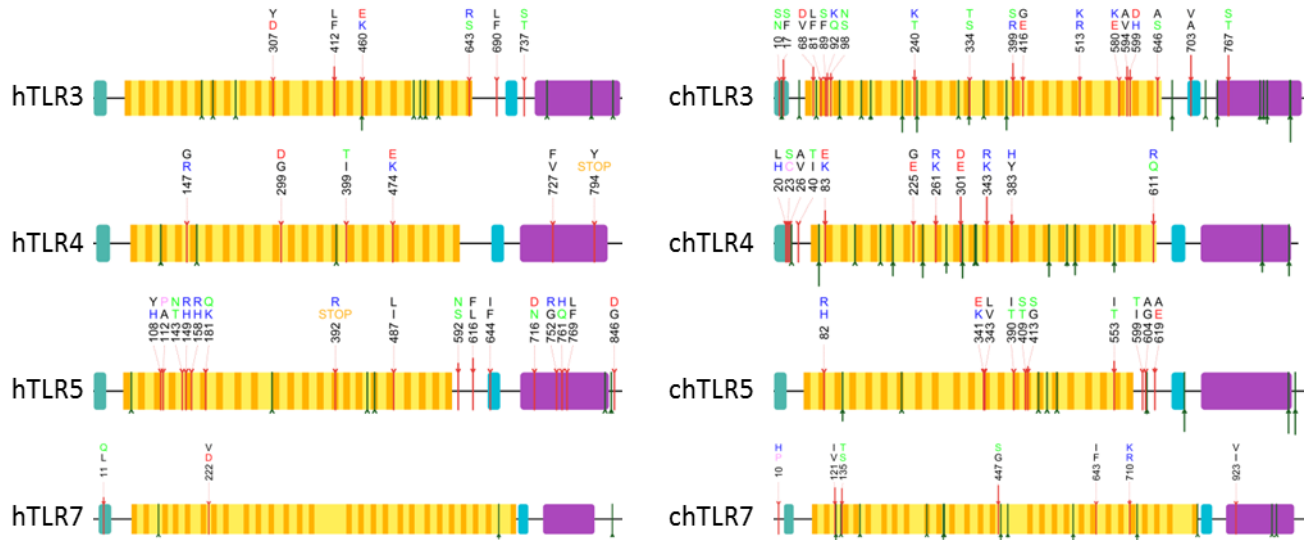

**Figure S1. Localisation of single nucleotide variation (SNV) in the linear structure of chicken (ch) and human (h) *Toll-like receptors* (TLRs).** Regions encoding signal peptides are coloured teal, highly conserved segments of leucine rich repeats (LRRs) orange, variable segments of LRR yellow, transmembrane domains cyan and Toll/interleukin-1 receptor (TIR) domains purple. Non-synonymous SNVs are indicated above with a red arrow and synonymous SNVs below with a dark green arrow. Length of the arrow is proportional to the frequency of minor variants in the SNV. Non-synonymous SNVs are labelled with their position numbers in the amino acid sequence and amino acid variants. Amino acid symbols are coloured according to their physicochemical properties: hydrophobic (A, F, G, I, L, M, V, W, Y) in black, polar uncharged (N, Q, S, T) in green, positively charged (H, K, R) in blue, polar negatively charged (D, E) in red, special cases (C, P) in pink and premature stop codons in orange. The location of signal peptides was predicted using SignalP 4.0<sup>1</sup>, LRRs using LRRfinder (<http://www.lrrfinder.com>), TIR domains using SMART 7 (<http://smart.embl-heidelberg.de/>);

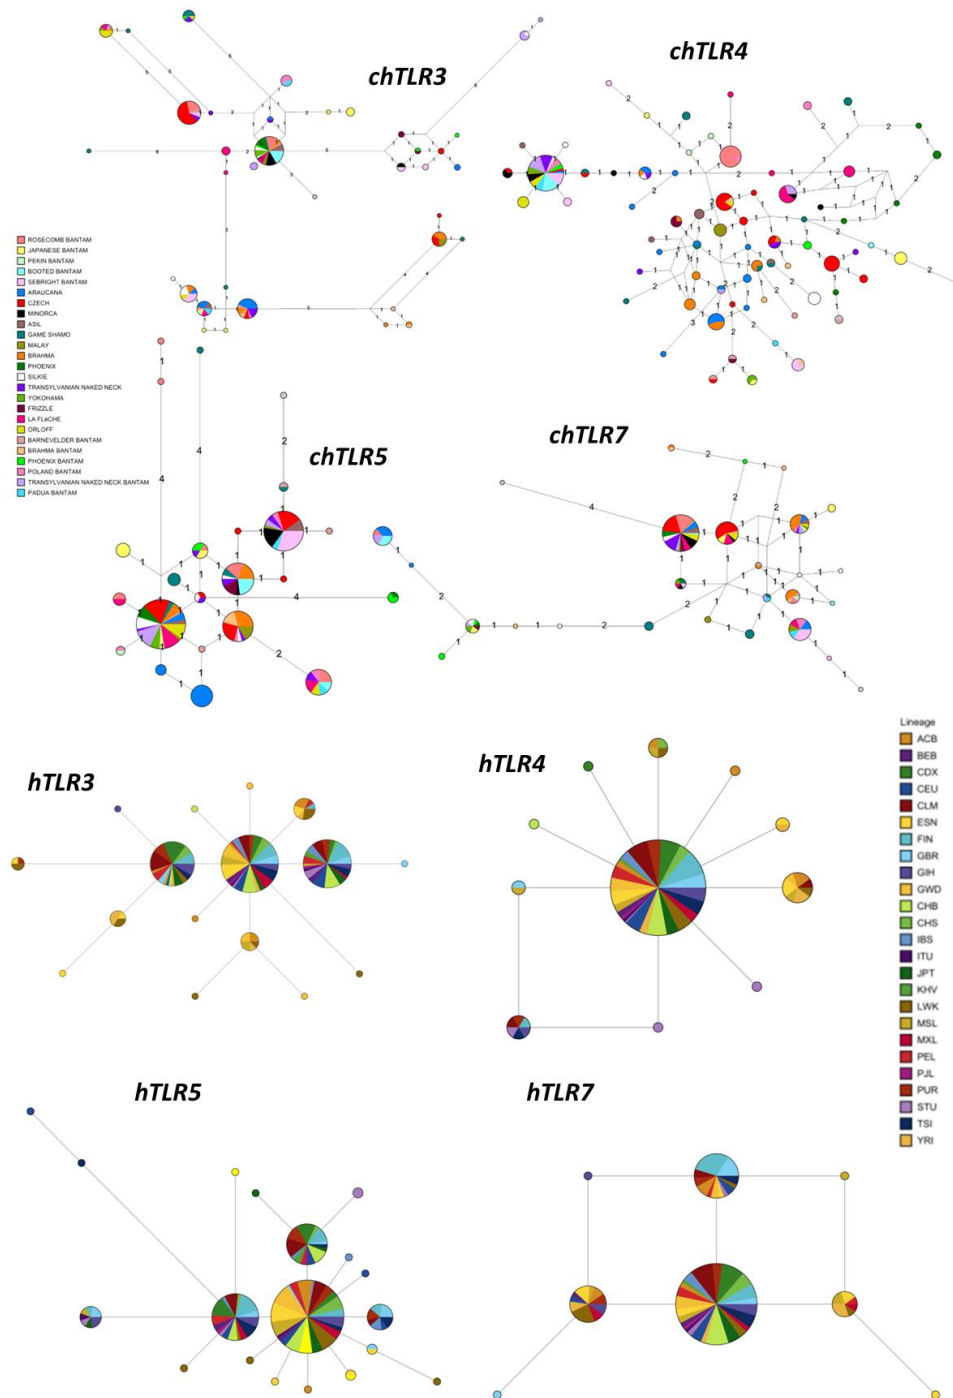

**Figure S2. Chicken (ch) and human (h) *Toll-like receptor* (TLR) haplotype networks.** Pie charts represent unique alleles, with the radius of each pie chart proportional to the frequency of the allele. Lengths of the connecting lines are proportional to the number of pairwise differences between joined haplotypes (also indicated by the number above each line). Pie chart segments are coloured according to the corresponding chicken breed or human population (see in-figure legend on the left or S1 Dataset).



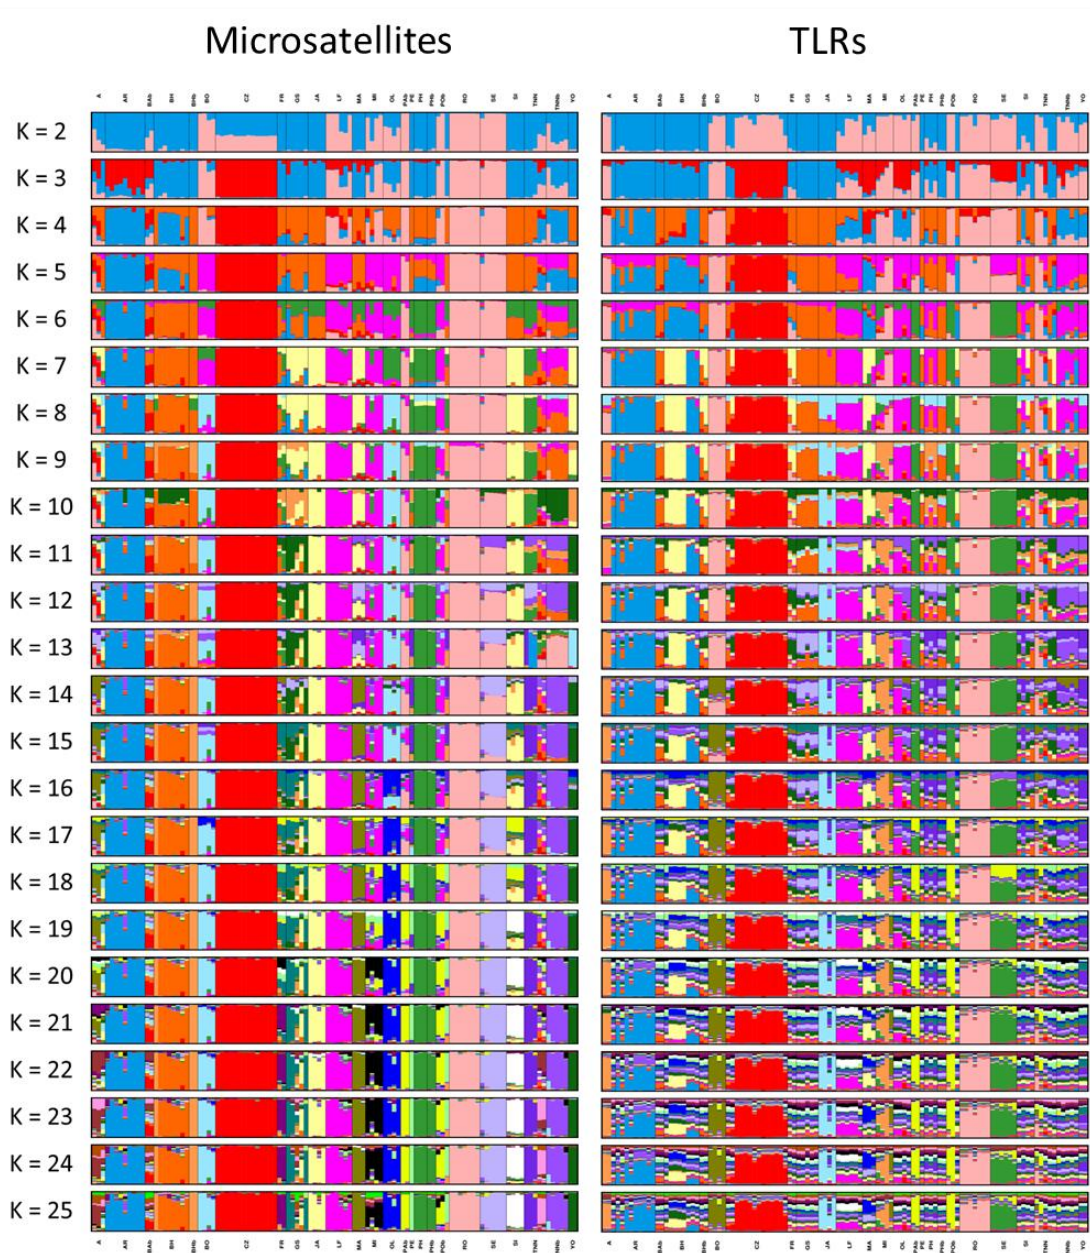

**Figure S4. Chicken population structure reconstructed based on Neutral microsatellites and *Toll-like receptor* (TLR) alleles.** Number of groups to which individuals are divided (K) is indicated on the right, groups are indicated with different colours with their number increasing from the top to bottom. Individuals are ordered according to breed (separated by black lines); breeds are marked with abbreviations above and below the diagram: A = Asil, AR = Araucana, BAb = Barnevelder bantam, BH = Brahma, BHb = Brahma bantam, BO = Booted Bantam, CZ = Czech Golden Pencilled, FR = Frizzle, GS = Game Shamo, JA = Japanese Bantam, LF = La Flèche, MA = Malay, MI = Minorca, OL = Orloff, PAb = Padua bantam, PE = Pekin Bantam, PH = Phoenix, PHb = Phoenix bantam, POb = Poland bantam, RO = Rosecomb Bantam, SE = Sebright, SI = Silkie, TNN = Transylvanian Naked Neck, TNNb = Transylvanian Naked Neck bantam, YO = Yokohama.

## Supplementary Tables

**Table S1. Genetic variation observed in chicken *Toll-like receptors* (*chTLRs*).** Genetic variants were determined according to their ancestral state (for details see SI Material and Methods). Single nucleotide variation sites with minor frequency > 1 % (i.e. single nucleotide polymorphisms; SNP) are highlighted in bold. Type of amino acid replacement is marked as radical (Rad.) or conservative (Con.) according to the physicochemical properties of alternative amino acid side chains. Substitutions were classified by PROVEAN analysis to be putatively either “neutral” (Neutr.) or “deleterious” (Delet.) according to their delta alignment score (Table S2). In our study, “deleterious” in the PROVEAN analysis is interpreted as non-conservative and may mean change of the function (e.g. change in the molecule binding in the ligand-binding region of the receptor), but not necessarily functional impairment. Minimum distance means that the minimum distance of a substituted amino acid to any amino acid belonging to the predicted functional site is less than indicated. We used the following sequences as references (GenBank IDs): *chTLR3* - NM\_001011691.3, *chTLR4* - NM\_001030693.1, *chTLR5* - NM\_001024586.1, and *chTLR7* - NM\_001011688.2). *Gallus* variants were described by Downing et al.<sup>3</sup>. AA = amino acid, SNV = single nucleotide variant, TM = transmembrane domain, LRR = leucine rich repeat, VS = variable sequence, HCS = highly conserved sequence, ref. = reference, RJF = red junglefowl (*Gallus gallus*), GnJF = green junglefowl (*Gallus varius*), SJF = Sri Lankan junglefowl (*Gallus lafayettii*), GyJF = grey junglefowl (*Gallus sonneratii*), A = Asil, AR = Araucana, BAb = Barnevelder bantam, BH = Brahma, BHb = Brahma bantam, BO = Booted Bantam, CZ = Czech Golden Pencilled, FR = Frizzle, GS = Game Shamo, JA = Japanese Bantam, LF = La Flèche, MA = Malay, MI = Minorca, OL = Orloff, PAb = Padua bantam, PE = Pekin Bantam, PH = Phoenix, PHb = Phoenix bantam, POb = Poland bantam, RO = Rosecomb Bantam, SE = Sebright, SI = Silkie, TNN = Transylvanian Naked Neck, TNNb = Transylvanian Naked Neck bantam, YO = Yokohama.

| Gene        | SNV position | Sequence change | AA replacement | Domain   | Type of AA replacement | PROVEAN prediction | Minimum distance(Å) | Frequency (%) | Alleles with derived variant           | Breeds containing derived nt variant                                                                 | Other studies | dbSNP      | Gallus variability |      |     |      |
|-------------|--------------|-----------------|----------------|----------|------------------------|--------------------|---------------------|---------------|----------------------------------------|------------------------------------------------------------------------------------------------------|---------------|------------|--------------------|------|-----|------|
|             |              |                 |                |          |                        |                    |                     |               |                                        |                                                                                                      |               |            | RJF                | GnJf | SJF | GvJF |
| <i>TLR3</i> | 29           | AGC→AAC         | S10N           | signal   | Con.                   | Neut.              | –                   | 0.5           | 37                                     | TNNb                                                                                                 |               | novel      | G                  | G    | G   | G    |
| <i>TLR3</i> | 40           | A→C             | silent         | –        | –                      | –                  | –                   | 5.9           | 16, 26, 37                             | PAb, POB, SI, TNNb                                                                                   |               | rs80605562 | A                  | A    | A   | A    |
| <i>TLR3</i> | 50           | TCT→TTT         | S17F           | signal   | Rad.                   | Neut.              | –                   | 39.1          | 1-5, 8, 21, 22, 29, 31, 32, 35         | A, AR, BAb, BH, BO, FR, GS, LF, MA, MI, OL, PE, PH, PHb, RO, SE, SI, TNN, TNNb, YO                   |               | rs80694638 | C/T                | T    | C   | C    |
| <i>TLR3</i> | 132          | A→T             | silent         | –        | –                      | –                  | –                   | 2.7           | 26, 37                                 | SI, TNNb                                                                                             |               | rs80753723 | A                  | A    | A   | A    |
| <i>TLR3</i> | 203          | GTT→GAT         | V68D           | LRR1-VS  | Rad.                   | Neut.              | 8                   | 75.0          | 1-6, 8-12, 16-18, 20-26, 29, 31, 35-37 | A, AR, BAb, BH, BO, CZ, FR, GS, JA, LF, MA, MI, OL, PAb, PE, PH, PHb, POB, RO, SE, SI, TNN, TNNb, YO | (4)           | rs80692549 | T/A                | A    | T   | T/A  |
| <i>TLR3</i> | 219          | C→T             | silent         | –        | –                      | –                  | –                   | 0.5           | 32                                     | GS                                                                                                   |               | novel      | C                  | C    | C   | C    |
| <i>TLR3</i> | 243          | TTA→TTC         | L81F           | LRR2-HCS | Con.                   | Delet.             | 10                  | 1.4           | 29                                     | TNNb                                                                                                 |               | novel      | A                  | A    | A   | A    |
| <i>TLR3</i> | 266          | TCT→TTT         | S89F           | LRR2-VS  | Rad.                   | Delet.             | 4                   | 0.5           | 35                                     | SI                                                                                                   |               | novel      | C                  | C    | C   | C    |
| <i>TLR3</i> | 274          | CAA→AAA         | Q92K           | LRR2-VS  | Rad.                   | Neut.              | 10                  | 86.4          | 1-12, 16-18, 20-26, 29-31, 35-37       | in all breeds                                                                                        | (4)           | rs14479722 | C/A                | A    | C   | C    |
| <i>TLR3</i> | 293          | AAT→AGT         | N98S           | LRR2-VS  | Con.                   | Neut.              | 17                  | 13.2          | 13-15, 19, 27, 28, 33, 34              | BH, BHb, CZ, GS, LF, MA, OL, TNNb                                                                    |               | rs14479723 | A/G                | A    | A   | A    |
| <i>TLR3</i> | 339          | T→C             | silent         | –        | –                      | –                  | –                   | 95.9          | 1-19, 21-23, 25-37                     | in all breeds                                                                                        | (4)           | rs80589777 | C                  | C    | C   | C    |
| <i>TLR3</i> | 447          | G→A             | silent         | –        | –                      | –                  | –                   | 0.5           | 32                                     | GS                                                                                                   |               | novel      | G                  | G    | G   | G    |
| <i>TLR3</i> | 495          | A→T             | silent         | –        | –                      | –                  | –                   | 6.8           | 14, 15, 19, 27, 33                     | BH, BHb, GS, LF, MA, OL, TNNb                                                                        |               | rs80695473 | A                  | A    | A   | A    |
| <i>TLR3</i> | 657          | A→G             | silent         | –        | –                      | –                  | –                   | 30.5          | 4, 5, 7-12, 14, 27, 28, 32, 35         | A, AR, BAb, BH, BHb, CZ, GS, JA, LF, OL, PAb, PE, POB, SE, SI, TNN                                   | (4)           | rs80630123 | A/G                | A    | A/G | A    |
| <i>TLR3</i> | 719          | AAA→ACA         | K240T          | LRR8-VS  | Rad.                   | Neut.              | 33                  | 19.5          | 6, 19, 34                              | BAb, BH, CZ, LF, MA, OL, RO, SE,                                                                     |               | rs80619479 | A/C                | A    | A   | A    |

| Gene        | SNV position | Sequence change | AA replacement | Domain    | Type of AA replacement | PROVEAN prediction | Minimum distance(Å) | Frequency (%) | Alleles with derived variant   | Breeds containing derived nt variant                                            | Other studies | dbSNP       | Gallus variability |      |     |      |
|-------------|--------------|-----------------|----------------|-----------|------------------------|--------------------|---------------------|---------------|--------------------------------|---------------------------------------------------------------------------------|---------------|-------------|--------------------|------|-----|------|
|             |              |                 |                |           |                        |                    |                     |               |                                |                                                                                 |               |             | R/JF               | Gn/f | S/F | Gy/f |
| <i>TLR3</i> | <b>732</b>   | A→G             | silent         | –         | –                      | –                  | –                   | <b>30.5</b>   | 4, 5, 7-12, 14, 27, 28, 32, 35 | TNN, TNNb<br>A, AR, BAB, BH, BHb, CZ, GS, JA, LF, OL, PAb, PE, POB, SE, SI, TNN | (4)           | rs80733702  | A/G                | A    | A/G | A/G  |
| <i>TLR3</i> | <b>945</b>   | A→G             | silent         | –         | –                      | –                  | –                   | <b>97.3</b>   | 1-25, 27-36                    | in all breeds                                                                   | (4)           | novel       | G                  | G    | G   | G    |
| <i>TLR3</i> | <b>999</b>   | T→G             | silent         | –         | –                      | –                  | –                   | <b>16.4</b>   | 3, 13, 15-18, 20, 34           | AR, BH, CZ, GS, JA, MA, OL, PAb, PHb, POB, TNN, TNNb                            |               | rs80738024  | T/G                | G    | T   | T    |
| <i>TLR3</i> | <b>1000</b>  | ACT→TCT         | T334S          | LRR12-HCS | Con.                   | Neut.              | 35                  | <b>3.6</b>    | 20                             | GS, OL, PHb, TNN                                                                |               | rs80572088  | A                  | T    | A   | A    |
| <i>TLR3</i> | <b>1047</b>  | G→A             | silent         | –         | –                      | –                  | –                   | <b>2.7</b>    | 26, 37                         | SI, TNNb                                                                        |               | novel       | G                  | G    | G   | G    |
| <i>TLR3</i> | <b>1164</b>  | T→C             | silent         | –         | –                      | –                  | –                   | <b>26.4</b>   | 5, 7-12, 35                    | A, AR, BAB, BH, BHb, CZ, GS, JA, LF, OL, PAb, PE, POB, SE, SI, TNN              | (4)           | rs80749871  | T/C                | T    | T   | T    |
| <i>TLR3</i> | <b>1197</b>  | AGC→AGG         | S399R          | LRR14-VS  | Rad.                   | Neut.              | 33                  | <b>32.3</b>   | 7-12, 21-25, 30, 32, 35        | A, AR, BAB, BH, BHb, CZ, FR, GS, JA, LF, MI, OL, PAb, PE, PHb, POB, SE, SI, TNN | (4)           | rs80713467  | C/G                | C    | C/G | C    |
| <i>TLR3</i> | <b>1247</b>  | GGG→GAG         | G416E          | LRR15-VS  | Rad.                   | Delet.             | 28                  | <b>6.8</b>    | 21-25, 30, 31                  | AR, CZ, FR, MI, PHb, SE                                                         |               | rs80718952  | G/A                | G    | G/A | G/A  |
| <i>TLR3</i> | 1326         | G→A             | silent         | –         | –                      | –                  | –                   | 0.0           | Only in ref. NM001011691.3     |                                                                                 |               | novel       | G                  | G    | G   | G    |
| <i>TLR3</i> | 1329         | T→C             | silent         | –         | –                      | –                  | –                   | 0.0           | Only in ref. NM001011691.3     |                                                                                 |               | novel       | T                  | T    | T   | T    |
| <i>TLR3</i> | <b>1538</b>  | AAG→AGG         | K513R          | LRR19-VS  | Con.                   | Neut.              | 12                  | <b>7.3</b>    | 21-25, 30-32                   | AR, CZ, FR, GS, MI, PHb, SE                                                     | (4)           | rs314125162 | A/G                | A    | A/G | A    |
| <i>TLR3</i> | <b>1738</b>  | AAA→GAA         | K580E          | LRR22-HCS | Rad.                   | Neut.              | 18                  | <b>1.4</b>    | 27, 28                         | BH, BHb                                                                         |               | novel       | A                  | A    | A   | A    |
| <i>TLR3</i> | <b>1781</b>  | GCG→GTG         | A594V          | LRR22-VS  | Con.                   | Neut.              | 8                   | <b>25.9</b>   | 7-12, 35                       | A, AR, BAB, BH, BHb, CZ, GS, JA, LF, OL, PAb, PE, POB, SE, SI, TNN              | (4)           | rs80778047  | C/T                | C    | C   | C    |
| <i>TLR3</i> | <b>1795</b>  | GAC→CAC         | D599H          | LRR22-VS  | Rad.                   | Delet.             | 17                  | <b>20.0</b>   | 6, 19, 33, 36                  | BAB, BH, CZ, GS, LF, MA, OL, RO,                                                |               | rs80668052  | G/C                | G    | G   | G    |



| Gene        | SNV position | Sequence change | AA replacement | Domain   | Type of AA replacement | PROVEAN prediction | Minimum distance(Å) | Frequency (%) | Alleles with derived variant                | Breeds containing derived nt variant                                                             | Other studies | dbSNP       | Gallus variability |      |     |      |
|-------------|--------------|-----------------|----------------|----------|------------------------|--------------------|---------------------|---------------|---------------------------------------------|--------------------------------------------------------------------------------------------------|---------------|-------------|--------------------|------|-----|------|
|             |              |                 |                |          |                        |                    |                     |               |                                             |                                                                                                  |               |             | R/JF               | Gulf | S/F | G/JF |
| <i>TLR3</i> | <b>1936</b>  | GCT→TCT         | A646S          | LRR24-VS | Rad.                   | Neut.              | 6                   | <b>5.0</b>    | 19, 33                                      | SE, TNN, TNNb<br>BH, GS, LF, MA, OL, TNNb                                                        |               | rs80636705  | G/T                | G    | G   | G    |
| <i>TLR3</i> | <b>2013</b>  | A→G             | silent         | –        | –                      | –                  | –                   | <b>72.3</b>   | 1, 2, 4, 5, 7-15, 17, 18, 21-32, 34, 35, 37 | in all breeds                                                                                    | (4)           | rs80682282  | A/G                | A    | G   | G    |
| <i>TLR3</i> | <b>2108</b>  | GTT→GCT         | V703A          | TM       | Con.                   | Neut.              | –                   | <b>47.3</b>   | 7-15, 20-28, 30, 31, 34, 35, 37             | A, AR, BAb, BH, BHb, CZ, FR, GS, JA, LF, MA, MI, OL, PAb, PE, PHb, POB, SE, SI, TNN, TNNb        | (4)           | rs80641674  | T/C                | C    | T/C | T    |
| <i>TLR3</i> | <b>2184</b>  | T→C             | silent         | –        | –                      | –                  | –                   | <b>2.3</b>    | 17, 18                                      | JA                                                                                               |               | novel       | T                  | T    | T   | T    |
| <i>TLR3</i> | <b>2244</b>  | T→C             | silent         | –        | –                      | –                  | –                   | <b>80.0</b>   | 1-5, 7-18, 20-32, 34, 35, 37                | in all breeds                                                                                    | (4)           | rs316147248 | T/C                | C    | C   | C    |
| <i>TLR3</i> | <b>2299</b>  | TCT→ACT         | S767T          | TIR      | Con.                   | Neut.              | –                   | <b>47.3</b>   | 7-15, 20-28, 30, 31, 34, 35, 37             | A, AR, BAb, BH, BHb, CZ, FR, GS, JA, LF, MA, MI, OL, PAb, PE, PHb, POB, SE, SI, TNN, TNNb        | (4)           | rs80747649  | T/A                | A    | T/A | T/A  |
| <i>TLR3</i> | <b>2463</b>  | G→A             | silent         | –        | –                      | –                  | –                   | <b>6.8</b>    | 21, 23, 24, 26, 30, 31, 37                  | AR, CZ, FR, PHb, SI, TNNb                                                                        |               | novel       | G/A                | G    | G   | G    |
| <i>TLR3</i> | <b>2481</b>  | T→A             | silent         | –        | –                      | –                  | –                   | <b>6.4</b>    | 13, 15, 34                                  | BH, CZ, GS, MA                                                                                   |               | rs80726550  | T                  | T    | T   | T    |
| <i>TLR3</i> | <b>2499</b>  | A→G             | silent         | –        | –                      | –                  | –                   | <b>85.5</b>   | 1-7, 10, 12-34, 36, 37                      | in all breeds                                                                                    | (4)           | rs80725644  | A/G                | G    | G   | G    |
| <i>TLR3</i> | <b>2616</b>  | A→G             | silent         | –        | –                      | –                  | –                   | <b>2.7</b>    | 11, 12, 18                                  | JA                                                                                               |               | novel       | A                  | A    | A   | A    |
| <i>TLR3</i> | <b>2619</b>  | C→T             | silent         | –        | –                      | –                  | –                   | <b>50.9</b>   | 1-6, 10, 16, 19, 29, 32, 33, 36             | A, AR, BAb, BH, BO, CZ, FR, GS, LF, MA, MI, OL, PAb, PE, PH, PHb, POB, RO, SE, SI, TNN, TNNb, YO | (4)           | rs80676425  | C/T                | C    | C   | C    |
| <i>TLR4</i> | <b>59</b>    | CTC→CAC         | L20H           | signal   | Rad.                   | Neut.              | –                   | <b>1.8</b>    | 58                                          | OL                                                                                               |               | novel       | T                  | T    | T   | T    |
| <i>TLR4</i> | <b>68</b>    | TCC→TGC         | S23C           | signal   | Rad.                   | Neut.              | –                   | <b>3.2</b>    | 55-57, 63, 68                               | GS, JA, PE, POB                                                                                  |               | novel       | C                  | C    | C   | C    |

| Gene        | SNV position | Sequence change | AA replacement | Domain   | Type of AA replacement | PROVEAN prediction | Minimum distance(Å) | Frequency (%) | Alleles with derived variant                                                               | Breeds containing derived nt variant                                                          | Other studies | dbSNP       | Gallus variability |     |     |      |
|-------------|--------------|-----------------|----------------|----------|------------------------|--------------------|---------------------|---------------|--------------------------------------------------------------------------------------------|-----------------------------------------------------------------------------------------------|---------------|-------------|--------------------|-----|-----|------|
|             |              |                 |                |          |                        |                    |                     |               |                                                                                            |                                                                                               |               |             | R/F                | G/f | S/F | G/yF |
| <i>TLR4</i> | <b>77</b>    | GCA→GTA         | A26V           | signal   | Con.                   | Neut.              | -                   | <b>2.7</b>    | 61, 64-66                                                                                  | AR, JA, YO                                                                                    |               | novel       | C                  | C   | C   | C    |
| <i>TLR4</i> | <b>87</b>    | C→T             | silent         | -        | -                      | -                  | -                   | <b>1.4</b>    | 39, 64, 65                                                                                 | AR, SE                                                                                        |               | novel       | C                  | C   | C   | C    |
| <i>TLR4</i> | <b>119</b>   | ACA→ATA         | T40I           | non-LRR  | Rad.                   | Neut.              | 11                  | <b>1.4</b>    | 59, 60                                                                                     | PH                                                                                            |               | novel       | C                  | C   | C   | C    |
| <i>TLR4</i> | <b>219</b>   | G→A             | silent         | -        | -                      | -                  | -                   | <b>57.3</b>   | 3-6, 8-12, 15, 16, 18-20, 26-29, 35, 37, 40, 42, 43, 45, 48, 51, 53, 54, 58-60, 62, 65, 70 | A, AR, BAb, BH, BHb, BO, CZ, GS, JA, LF, MA, MI, OL, PAb, PH, PHb, POB, SE, SI, TNN, TNNb, YO | (5)           | rs14102162  | A/G                | G   | G   | G    |
| <i>TLR4</i> | <b>247</b>   | GAA→AAA         | E83K           | LRR1-VS  | Rad.                   | Neut.              | 12                  | <b>25.0</b>   | 8-12, 58, 70                                                                               | A, AR, BO, CZ, MA, MI, OL, PAb, PHb, POB, SE, SI, TNN, TNNb, YO                               | (5)           | rs14102161  | G/A                | G   | G   | G    |
| <i>TLR4</i> | <b>393</b>   | G→A             | silent         | -        | -                      | -                  | -                   | <b>2.7</b>    | 47, 48                                                                                     | JA                                                                                            |               | novel       | G                  | G   | G   | G    |
| <i>TLR4</i> | <b>516</b>   | T→C             | silent         | -        | -                      | -                  | -                   | <b>2.7</b>    | 42, 52, 59, 60                                                                             | BHb, GS, PH                                                                                   |               | novel       | T                  | T   | T   | T    |
| <i>TLR4</i> | <b>576</b>   | A→G             | silent         | -        | -                      | -                  | -                   | <b>24.5</b>   | 8, 9, 11, 12, 35, 38, 58                                                                   | A, AR, BO, CZ, GS, MA, MI, OL, PAb, PHb, POB, SE, SI, TNN, TNNb, YO                           | (5)           | rs313485338 | A/G                | G   | A   | G/A  |
| <i>TLR4</i> | <b>674</b>   | GGA→GAA         | G225E          | LRR7-VS  | Rad.                   | Delet.             | 12                  | <b>5.5</b>    | 44-46, 61, 67                                                                              | BAb, BH, BHb, CZ, FR, JA, YO                                                                  |               | novel       | G/A                | G   | G   | G    |
| <i>TLR4</i> | <b>720</b>   | T→A             | silent         | -        | -                      | -                  | -                   | <b>27.7</b>   | 8-10, 12, 33, 35, 38, 58                                                                   | A, AR, BH, BO, CZ, GS, MA, MI, OL, PAb, PHb, POB, SE, SI, TNN, TNNb, YO                       | (5)           | rs318223020 | T/A                | A   | T   | A/T  |
| <i>TLR4</i> | <b>782</b>   | AGA→AAA         | R261K          | LRR9-HCS | Con.                   | Neut.              | 6                   | <b>15.9</b>   | 23, 24, 47-49, 68-70                                                                       | BO, JA, LF, MI, PE, POB, RO, TNNb                                                             | (5)           | rs312339277 | G                  | G   | G   | G    |
| <i>TLR4</i> | <b>834</b>   | C→T             | silent         | -        | -                      | -                  | -                   | <b>19.5</b>   | 6, 13, 14, 16, 17, 20, 25, 26, 28, 30-32, 46, 65, 66                                       | A, AR, BH, BHb, CZ, FR, GS, OL, TNN, TNNb                                                     | (5)           | novel       | C                  | C   | C   | C    |
| <i>TLR4</i> | <b>903</b>   | GAG→GAT         | E301D          | LRR10-VS | Con.                   | Neut.              | 10                  | <b>50.5</b>   | 8-12, 23, 24, 33-39, 50, 51, 55-58, 62, 64, 65, 68-70                                      | A, AR, BAb, BH, BO, CZ, GS, JA, LF, MA, MI, OL, PAb, PE, PHb, POB, RO,                        | (5)           | rs15032443  | G/T                | T   | T   | T    |

| Gene        | SNV position | Sequence change | AA replacement | Domain    | Type of AA replacement | PROVEAN prediction | Minimum distance(Å) | Frequency (%) | Alleles with derived variant                                               | Breeds containing derived nt variant                                                                  | Other studies | dbSNP       | Gallus variability |     |     |      |
|-------------|--------------|-----------------|----------------|-----------|------------------------|--------------------|---------------------|---------------|----------------------------------------------------------------------------|-------------------------------------------------------------------------------------------------------|---------------|-------------|--------------------|-----|-----|------|
|             |              |                 |                |           |                        |                    |                     |               |                                                                            |                                                                                                       |               |             | R/F                | G/f | S/F | G/yf |
| <i>TLR4</i> | <b>912</b>   | A→G             | silent         | –         | –                      | –                  | –                   | <b>71.4</b>   | 1-8, 13-32, 36, 37, 39-57, 59-63, 65-70                                    | SE, SI, TNN, TNNb, YO<br>in all breeds                                                                | (5)           | rs15032442  | G/A                | A   | G   | G/A  |
| <i>TLR4</i> | 972          | T→C             | silent         | –         | –                      | –                  | –                   | 0.5           | 50                                                                         | BAb                                                                                                   |               | novel       | T                  | T   | T   | T    |
| <i>TLR4</i> | <b>978</b>   | G→A             | silent         | –         | –                      | –                  | –                   | <b>2.3</b>    | 51                                                                         | SI                                                                                                    |               | novel       | G/A                | G   | G   | G    |
| <i>TLR4</i> | <b>1028</b>  | AAA→AGA         | K343R          | LRR12-HCS | Con.                   | Neut.              | 4                   | <b>50.5</b>   | 1-7, 13-22, 25-32, 40-51, 61-63, 65-67                                     | A, AR, BAb, BH, BHb, BO, CZ, FR, GS, JA, MA, OL, PAb, PH, PHb, POB, SE, SI, TNN, TNNb, YO             | (5)           | rs15032441  | G/A                | A   | A   | A    |
| <i>TLR4</i> | <b>1147</b>  | TAC→CAC         | Y383H          | LRR13-VS  | Rad.                   | Neut.              | 20                  | <b>82.3</b>   | 8-39, 44-49, 52-66, 68, 70                                                 | in all breeds                                                                                         | (5)           | rs15032440  | T/C                | C   | T/C | C/T  |
| <i>TLR4</i> | <b>1327</b>  | T→C             | silent         | –         | –                      | –                  | –                   | <b>74.1</b>   | 1, 3-6, 8-13, 16, 18-20, 22-25, 32-40, 42, 43, 47-49, 52-60, 63, 64, 68-70 | A, AR, BAb, BH, BHb, BO, CZ, GS, JA, LF, MA, MI, OL, PAb, PE, PH, PHb, POB, RO, SE, SI, TNN, TNNb, YO | (5)           | rs317177658 | C/T                | C   | T   | C    |
| <i>TLR4</i> | <b>1416</b>  | C→T             | silent         | –         | –                      | –                  | –                   | <b>6.8</b>    | 2, 7, 17, 21, 44, 45, 61                                                   | BAb, BHb, CZ, FR, GS, JA, PAb, SE, YO                                                                 |               | novel       | C/T                | C   | C   | C    |
| <i>TLR4</i> | <b>1455</b>  | C→G             | silent         | –         | –                      | –                  | –                   | <b>22.7</b>   | 1, 3-6, 18, 24, 32, 36, 37, 43, 47-49, 52-54, 59, 60, 63, 69, 70           | BAb, BO, CZ, GS, JA, LF, MI, PH, PHb, POB, TNN, TNNb                                                  | (5)           | rs15032439  | C/G                | C   | C   | C    |
| <i>TLR4</i> | <b>1644</b>  | A→G             | silent         | –         | –                      | –                  | –                   | <b>17.7</b>   | 2, 7, 21, 24, 37, 44, 45, 52, 54, 55, 59-61, 63, 70                        | BAb, BHb, CZ, FR, GS, JA, LF, MI, PAb, PH, POB, SE, TNNb, YO                                          | (5)           | rs314545479 | A/G                | A   | A   | A    |
| <i>TLR4</i> | <b>1832</b>  | CAG→CGG         | Q611R          | LRRCT-VS  | Rad.                   | Neut.              | 22                  | <b>80.9</b>   | 8-24, 33-64, 66-70                                                         | in all breeds                                                                                         | (5)           | rs15032438  | G/A                | G   | G   | G    |
| <i>TLR4</i> | <b>2358</b>  | G→A             | silent         | –         | –                      | –                  | –                   | <b>17.7</b>   | 2, 4, 17, 24, 25, 36, 37, 39, 44, 45, 54, 56, 59-61, 63                    | A, BAb, BHb, CZ, FR, GS, JA, LF, MI, PH, POB, SE,                                                     | (5)           | rs314648336 | G/A                | G   | G   | G    |

| Gene        | SNV position | Sequence change | AA replacement | Domain    | Type of AA replacement | PROVEAN prediction | Minimum distance(Å) | Frequency (%) | Alleles with derived variant | Breeds containing derived nt variant                                                 | Other studies | dbSNP       | Gallus variability |     |     |     |
|-------------|--------------|-----------------|----------------|-----------|------------------------|--------------------|---------------------|---------------|------------------------------|--------------------------------------------------------------------------------------|---------------|-------------|--------------------|-----|-----|-----|
|             |              |                 |                |           |                        |                    |                     |               |                              |                                                                                      |               |             | R/F                | G/f | S/F | G/f |
| <i>TLR4</i> | <b>2487</b>  | G→T             | silent         | –         | –                      | –                  | –                   | <b>24.5</b>   | 3, 4, 6, 12, 17, 18, 20      | TNNb, YO<br>AR, BH, BHb, BO, CZ, GS, JA, MI, PH, PHb, SE, TNN                        |               | rs315160203 | G/T                | G   | T/G | G   |
| <i>TLR5</i> | <b>245</b>   | CGC→CAC         | R82H           | LRR2-HCS  | Con.                   | Neut.              | 5                   | <b>2.3</b>    | 17                           | JA                                                                                   |               | novel       | G                  | -   | G   | A   |
| <i>TLR5</i> | <b>336</b>   | G→C             | silent         | –         | –                      | –                  | –                   | <b>20.0</b>   | 1, 10, 12-14                 | A, BAb, CZ, GS, MA, MI, PAb, POB, SE, TNN, TNNb                                      | (6)           | rs313838337 | G/C                | -   | G   | G   |
| <i>TLR5</i> | <b>624</b>   | C→T             | silent         | –         | –                      | –                  | –                   | <b>1.4</b>    | 19                           | PH, PHb                                                                              |               | novel       | C                  | -   | C   | C   |
| <i>TLR5</i> | <b>1021</b>  | AAA→GAA         | K341E          | LRR12-HCS | Rad.                   | Neut.              | 15                  | <b>98.6</b>   | 1-20                         | in all breeds                                                                        |               | novel       | G                  | -   | G   | A   |
| <i>TLR5</i> | <b>1027</b>  | CTC→GTC         | L343V          | LRR12-HCS | Con.                   | Delet.             | 10                  | <b>0.9</b>    | 21, 22                       | RO                                                                                   |               | novel       | C                  | -   | C   | C   |
| <i>TLR5</i> | <b>1169</b>  | ATA→ACA         | I390T          | LRR14-HCS | Rad.                   | Neut.              | 14                  | <b>1.4</b>    | 19                           | PH, PHb                                                                              |               | novel       | T                  | -   | T   | T   |
| <i>TLR5</i> | <b>1225</b>  | TCT→ACT         | S409T          | LRR15-HCS | Con.                   | Neut.              | 16                  | <b>2.3</b>    | 19, 21, 22                   | PH, PHb, RO                                                                          |               | novel       | T                  | -   | T   | T   |
| <i>TLR5</i> | <b>1237</b>  | GGT→AGT         | G413S          | LRR15-HCS | Rad.                   | Neut.              | 10                  | <b>89.5</b>   | 1-15, 17, 18, 20             | in all breeds                                                                        |               | novel       | A                  | -   | A   | G   |
| <i>TLR5</i> | <b>1249</b>  | CTG→ATG         | L417M          | LRR15-HCS | Con.                   | Neut.              | 9                   | <b>0.0</b>    | Only in ref. NM_001024586.1  |                                                                                      | (6)           | novel       | C                  | -   | C   | C   |
| <i>TLR5</i> | <b>1290</b>  | T→A             | silent         | –         | –                      | –                  | –                   | <b>0.5</b>    | 23                           | GS                                                                                   |               | novel       | T                  | -   | T   | T   |
| <i>TLR5</i> | <b>1332</b>  | T→C             | silent         | –         | –                      | –                  | –                   | <b>0.5</b>    | 23                           | GS                                                                                   |               | novel       | T                  | -   | T   | T   |
| <i>TLR5</i> | <b>1380</b>  | T→C             | silent         | –         | –                      | –                  | –                   | <b>1.8</b>    | 9                            | GS                                                                                   |               | novel       | T                  | -   | T   | T   |
| <i>TLR5</i> | <b>1658</b>  | ATA→ACA         | I553T          | LRR21-HCS | Rad.                   | Neut.              | 35                  | <b>20.0</b>   | 1, 12-15                     | A, BAb, CZ, GS, MA, MI, PAb, POB, SE, TNN, TNNb                                      | (6)           | rs315734824 | C                  | -   | T   | T   |
| <i>TLR5</i> | <b>1796</b>  | ACC→ATC         | T599I          | LRRCT-VS  | Rad.                   | Delet.             | 35                  | <b>0.9</b>    | 20                           | PE, POB                                                                              |               | novel       | C                  | -   | C   | C   |
| <i>TLR5</i> | <b>1811</b>  | GCT→GGT         | A604G          | LRRCT-VS  | Con.                   | Neut.              | 29                  | <b>1.8</b>    | 18                           | LF, RO                                                                               |               | novel       | C                  | -   | C   | C   |
| <i>TLR5</i> | <b>1818</b>  | A→G             | silent         | –         | –                      | –                  | –                   | <b>93.2</b>   | 1, 2, 5-23                   | in all breeds                                                                        |               | novel       | G                  | -   | G   | G   |
| <i>TLR5</i> | <b>1856</b>  | GCG→GAG         | A619E          | LRRCT-VS  | Rad.                   | Neut.              | 46                  | <b>8.2</b>    | 16, 21                       | BO, LF, OL, PAb, POB, RO, TNN                                                        |               | rs312365402 | C                  | -   | C   | C   |
| <i>TLR5</i> | <b>2001</b>  | G→C             | silent         | –         | –                      | –                  | –                   | <b>61.4</b>   | 1-6, 9, 11, 16, 18-20        | A, AR, BAb, BH, BHb, BO, CZ, GS, JA, LF, MA, OL, PAb, PE, PH, PHb, POB, RO, SI, TNN, | (6)           | rs315207690 | G                  | -   | C   | C   |

| Gene        | SNV position | Sequence change | AA replacement | Domain  | Type of AA replacement | PROVEAN prediction | Minimum distance (Å) | Frequency (%) | Alleles with derived variant | Breeds containing derived nt variant                                                   | Other studies | dbSNP       | Gallus variability |      |     |      |
|-------------|--------------|-----------------|----------------|---------|------------------------|--------------------|----------------------|---------------|------------------------------|----------------------------------------------------------------------------------------|---------------|-------------|--------------------|------|-----|------|
|             |              |                 |                |         |                        |                    |                      |               |                              |                                                                                        |               |             | R/JF               | G/Jf | S/F | G/JF |
| <i>TLR5</i> | <b>2508</b>  | C→A             | silent         | –       | –                      | –                  | –                    | <b>41.8</b>   | 2-5, 13, 17, 18, 20-22       | TNNb, YO<br>A, AR, BAb, BH, CZ, GS, JA, LF, MA, OL, PE, PH, POB, RO, SI, TNN, TNNb, YO | (6)           | rs317408912 | C                  | -    | A   | C    |
| <i>TLR5</i> | <b>2541</b>  | T→C             | silent         | –       | –                      | –                  | –                    | <b>44.1</b>   | 1, 2, 4, 8, 9, 11, 14, 17-23 | A, AR, BAb, BH, CZ, GS, JA, LF, MA, OL, PE, PH, PHb, POB, RO, SI, TNN, TNNb, YO        | (6)           | rs314753079 | C/T                | -    | C   | T    |
| <i>TLR7</i> | 29           | CAC→CCC         | H10P           | ??      | Rad.                   | Neut.              | –                    | 0.9           | 23                           | PHb                                                                                    |               | novel       | A                  | A    | A   | A    |
| <i>TLR7</i> | 272          | GCA→GTA         | A91V           | LRR1-VS | Con.                   | Neut.              | –                    | 0.0           | Only in ref. NM001011688.1   |                                                                                        | (4)           | novel       | C                  | C    | C   | C    |
| <i>TLR7</i> | <b>361</b>   | ATC→GTC         | I121V          | LRR2-VS | Con.                   | Neut.              | –                    | <b>36.8</b>   | 7-11, 17-22, 24, 26, 27      | AR, BAb, BH, BHb, BO, GS, LF, MA, MI, PAb, PE, PH, POB, RO, SE, SI, TNNb, YO           |               | rs313827291 | G                  | G    | G   | G    |
| <i>TLR7</i> | <b>369</b>   | A→G             | silent         | –       | –                      | –                  | –                    | <b>16.8</b>   | 3, 6, 9-11, 18, 19           | A, AR, BAb, BH, BHb, BO, JA, MA, OL, PE, POB, RO, SI, TNN, TNNb                        |               | rs315579009 | A                  | A    | A   | A    |
| <i>TLR7</i> | 399          | T→A             | silent         | –       | –                      | –                  | –                    | 0.5           | 10                           | SI                                                                                     |               | novel       | T                  | T    | T   | T    |
| <i>TLR7</i> | <b>403</b>   | ACA→TCA         | T135S          | LRR2-VS | Con.                   | Neut.              | –                    | <b>35.0</b>   | 1, 2, 21                     | A, AR, BAb, BH, BO, CZ, FR, GS, LF, MI, OL, PH, RO, SE, SI, TNN, TNNb, YO              | (4)           | rs316953874 | A                  | A    | A   | A    |
| <i>TLR7</i> | <b>513</b>   | T→A             | silent         | –       | –                      | –                  | –                    | <b>5.0</b>    | 11, 18                       | BAb, BH, BHb, BO, PE, POB, RO                                                          |               | novel       | T                  | T    | T   | T    |
| <i>TLR7</i> | <b>912</b>   | T→C             | silent         | –       | –                      | –                  | –                    | <b>1.4</b>    | 6                            | JA                                                                                     |               | novel       | T                  | T    | T   | T    |
| <i>TLR7</i> | <b>1011</b>  | T→C             | silent         | –       | –                      | –                  | –                    | <b>87.3</b>   | 1-6, 8-25                    | in all breeds                                                                          | (4)           | rs14883503  | T                  | T    | T   | T    |
| <i>TLR7</i> | <b>1017</b>  | T→C             | silent         | –       | –                      | –                  | –                    | <b>98.2</b>   | 1-3, 5-12, 14, 16-27         | in all breeds                                                                          | (4)           | novel       | C                  | C    | C   | C    |

| Gene        | SNV position | Sequence change | AA replacement | Domain    | Type of AA replacement | PROVEAN prediction | Minimum distance(Å) | Frequency (%) | Alleles with derived variant              | Breeds containing derived nt variant                                                         | Other studies | dbSNP      | Gallus variability |      |     |      |
|-------------|--------------|-----------------|----------------|-----------|------------------------|--------------------|---------------------|---------------|-------------------------------------------|----------------------------------------------------------------------------------------------|---------------|------------|--------------------|------|-----|------|
|             |              |                 |                |           |                        |                    |                     |               |                                           |                                                                                              |               |            | RJF                | Gulf | SJF | GyJF |
| <i>TLR7</i> | <b>1339</b>  | AGT→GGT         | S447G          | LRR14-VS  | Rad.                   | Neut.              | 14                  | <b>41.8</b>   | 3-11, 17, 22, 23, 25, 27                  | A, AR, BH, BHb, BO, FR, GS, JA, LF, MA, OL, PAb, PE, PH, PHb, POB, RO, SE, SI, TNN, TNNb, YO |               | rs14883502 | G                  | G    | G   | G    |
| <i>TLR7</i> | <b>1356</b>  | T→C             | silent         | -         | -                      | -                  | -                   | <b>15.0</b>   | 5, 14, 17, 23, 25                         | AR, BHb, BO, FR, JA, PH, PHb, RO, SI, TNNb, YO                                               |               | novel      | T                  | T    | T   | T    |
| <i>TLR7</i> | <b>1398</b>  | C→T             | silent         | -         | -                      | -                  | -                   | <b>6.4</b>    | 5, 14, 16, 23                             | BHb, FR, JA, PH, PHb, SI, TNNb, YO                                                           |               | novel      | C                  | C    | C   | C    |
| <i>TLR7</i> | <b>1791</b>  | T→C             | silent         | -         | -                      | -                  | -                   | <b>82.7</b>   | 1-4, 6-13, 15, 18, 19, 21, 22, 24, 26, 27 | in all breeds                                                                                | (4)           | novel      | C                  | C    | C   | C    |
| <i>TLR7</i> | 1927         | ATT→TTT         | I643F          | LRR20-VS  | Con.                   | Delet.             | 13                  | 0.9           | 26, 27                                    | SE                                                                                           |               | novel      | A                  | A    | A   | A    |
| <i>TLR7</i> | 2005         | TCT→CCT         | S669P          | LRR21-HCS | Rad.                   | Neut.              | 12                  | 0.0           | Only in ref. NM001011688.1                |                                                                                              | (4)           | novel      | T                  | T    | T   | T    |
| <i>TLR7</i> | <b>2129</b>  | AAA→AGA         | K710R          | LRR22-VS  | Con.                   | Neut.              | 28                  | <b>9.1</b>    | 17, 25                                    | AR, BO, RO, TNNb                                                                             |               | novel      | A                  | A    | A   | A    |
| <i>TLR7</i> | <b>2175</b>  | C→G             | silent         | -         | -                      | -                  | -                   | <b>17.3</b>   | 5, 14, 16, 17, 20, 23, 25                 | AR, BHb, BO, FR, GS, JA, PH, PHb, RO, SI, TNNb, YO                                           |               | novel      | C                  | C    | C   | C    |
| <i>TLR7</i> | 2538         | C→T             | silent         | -         | -                      | -                  | -                   | 0.9           | 13                                        | BH, BHb                                                                                      |               | novel      | C                  | C    | C   | C    |
| <i>TLR7</i> | 2629         | GTG→ATG         | V877M          | IC        | Con.                   | Neut.              | -                   | 0.0           | Only in ref. NM001011688.1                |                                                                                              | (4)           | novel      | G                  | G    | G   | G    |
| <i>TLR7</i> | <b>2767</b>  | GTT→ATT         | V923I          | TIR       | Con.                   | Neut.              | -                   | <b>2.7</b>    | 22, 24                                    | GS, MA                                                                                       |               | novel      | G                  | G    | G   | G    |
| <i>TLR7</i> | 2772         | A→G             | silent         | -         | -                      | -                  | -                   | 0.0           | Only in ref. NM001011688.1                |                                                                                              | (4)           | novel      | A                  | A    | A   | A    |
| <i>TLR7</i> | 2985         | G→A             | silent         | -         | -                      | -                  | -                   | 0.9           | 13                                        | BH, BHb                                                                                      |               | novel      | G                  | G    | G   | G    |
| <i>TLR7</i> | <b>3012</b>  | A→G             | silent         | -         | -                      | -                  | -                   | <b>1.8</b>    | 4, 13, 15                                 | BH, BHb, PHb                                                                                 |               | novel      | A                  | A    | A   | A    |

**Table S2. Sites predicted by PROVEAN analysis to have putatively dramatic functional effects on the protein function analysis (PROVEAN delta alignment score lower than the cut-off of -2.5) and their localization in the TLRs.** Type of amino acid replacement is marked as “Radical” or “Conservative” according to the physicochemical properties of alternative amino acid side chains. h = human, ch = chicken, ECD = ligand-binding ectodomain, TIR = signalling TIR domain.

| <b>Gene</b> | <b>Site</b> | <b>PROVEAN score</b> | <b>Domain</b> | <b>Type of AA replacement</b> |
|-------------|-------------|----------------------|---------------|-------------------------------|
| hTLR3       | L412F       | -3.544               | ECD           | Conservative                  |
| hTLR4       | Y794stop    | -11.077              | TIR           | Radical                       |
| hTLR5       | P112A       | -4.774               | ECD           | Radical                       |
|             | R392stop    | -7.833               | ECD           | Radical                       |
|             | D716N       | -3.353               | TIR           | Radical                       |
|             | R752G       | -4.132               | TIR           | Radical                       |
| chTLR3      | L81F        | -3.402               | ECD           | Conservative                  |
|             | S89F        | -3.754               | ECD           | Radical                       |
|             | G416E       | -5.176               | ECD           | Radical                       |
|             | D599H       | -3.13                | ECD           | Radical                       |
| chTLR4      | G225E       | -4.751               | ECD           | Radical                       |
| chTLR5      | L343V       | -2.878               | ECD           | Conservative                  |
|             | T599I       | -5.433               | ECD           | Radical                       |
| chTLR7      | I643F       | -2.531               | ECD           | Conservative                  |

**Table S3. Sites identified as under positive selection using internal fixed effects likelihood (IFEL) and fast unconstrained Bayesian approximation (FUBAR) methods.** Sites showing significant levels of positive selection ( $p < 0.05$  for IFEL or Posterior probability  $> 0.95$  for FUBAR) are marked with an asterisk.

| Gene   | Site   | IFEL    | FUBAR           |
|--------|--------|---------|-----------------|
|        |        | p-value | Posterior prob. |
| hTLR4  | T399I  | -       | 0.940           |
| hTLR5  | I644F  | 0.088   | -               |
| chTLR3 | S17F   | -       | 0.908           |
|        | S399R  | -       | 0.947           |
|        | K513R  | -       | 0.937           |
| chTLR4 | S23C   | -       | 0.910           |
|        | A26V*  | -       | 0.972           |
|        | R261K* | -       | 0.983           |
|        | K343R* | -       | 0.985           |
|        | Y383H* | -       | 0.978           |
|        | Q611R* | 0.039   | 0.989           |
| chTLR5 | S409T  | -       | 0.922           |
|        | A619E  | -       | 0.927           |
| chTLR7 | I121V* | 0.028   | 0.970           |
|        | S447G* | 0.084   | 0.968           |



**Table S4. Allelic variability observed in chicken *Toll-like receptor (chTLR)* genes.** A = Asil, AR = Araucana, BAb = Barnevelder bantam, BH = Brahma, BHb = Brahma bantam, BO = Booted Bantam, CZ = Czech Golden Pencilled, FR = Frizzle, GS = Game Shamo, JA = Japanese Bantam, LF = La Flèche, MA = Malay, MI = Minorca, OL = Orloff, PAb = Padua bantam, PE = Pekin Bantam, PH = Phoenix, PHb = Phoenix bantam, POB = Poland bantam, RO = Rosecomb Bantam, SE = Sebright, SI = Silkie, TNN = Transylvanian Naked Neck, TNNb = Transylvanian Naked Neck bantam, YO = Yokohama

| Protein variant | Allele          | Frequency (%) | GenBank Acc. No.    | Breed                                                       |
|-----------------|-----------------|---------------|---------------------|-------------------------------------------------------------|
| chTLR3-Var.1    | chTLR3-Allele1  | 0.45          | NM001011691.3       | reference                                                   |
|                 | chTLR3-Allele2  | 22.17         | KU235138 - KU235152 | A, BAb, BH, BO, FR, GS, LF, MA, MI, PE, PH, PHb, RO, SI, YO |
|                 | chTLR3-Allele3  | 0.90          | KU235153, KU235154  | AR, TNN                                                     |
|                 | chTLR3-Allele4  | 1.81          | KU235155            | LF                                                          |
|                 | chTLR3-Allele5  | 0.45          | KU235156            | LF                                                          |
| chTLR3-Var.2    | chTLR3-Allele6  | 14.48         | KU235157 - KU235161 | BAb, CZ, RO, SE, TNN                                        |
| chTLR3-Var.3    | chTLR3-Allele7  | 10.41         | KU235162 - KU235168 | AR, BAb, BH, BHb, CZ, POB, TNN                              |
| chTLR3-Var.4    | chTLR3-Allele8  | 7.69          | KU235169 - KU235173 | AR, BH, OL, SE, SI                                          |
| chTLR3-Var.5    | chTLR3-Allele9  | 5.88          | KU235174 - KU235181 | A, AR, GS, JA, LF, PAb, PE, POB                             |
|                 | chTLR3-Allele10 | 0.45          | KU235182            | GS                                                          |
|                 | chTLR3-Allele11 | 0.45          | KU235183            | JA                                                          |
|                 | chTLR3-Allele12 | 0.45          | KU235184            | JA                                                          |
| chTLR3-Var.6    | chTLR3-Allele13 | 5.43          | KU235185 - KU235187 | BH, CZ, MA                                                  |
|                 | chTLR3-Allele14 | 0.45          | KU235188            | BHb                                                         |
|                 | chTLR3-Allele15 | 0.45          | KU235189            | GS                                                          |
| chTLR3-Var.7    | chTLR3-Allele16 | 3.17          | KU235190 - KU235192 | PAb, POB, TNNb                                              |

| <b>Protein variant</b> | <b>Allele</b>   | <b>Frequency (%)</b> | <b>GenBank Acc. No.</b> | <b>Breed</b>         |
|------------------------|-----------------|----------------------|-------------------------|----------------------|
|                        | chTLR3-Allele17 | 0.45                 | KU235193                | JA                   |
|                        | chTLR3-Allele18 | 1.81                 | KU235194                | JA                   |
| chTLR3-Var.8           | chTLR3-Allele19 | 4.52                 | KU235195 - KU235199     | BH, LF, MA, OL, TNNb |
| chTLR3-Var.9           | chTLR3-Allele20 | 3.62                 | KU235200 - KU235203     | GS, OL, PHb, TNN     |
| chTLR3-Var.10          | chTLR3-Allele21 | 0.90                 | KU235204, KU235205      | FR, PHb              |
|                        | chTLR3-Allele22 | 1.81                 | KU235206, KU235207      | MI, SE               |
| chTLR3-Var.11          | chTLR3-Allele23 | 0.90                 | KU235208                | CZ                   |
|                        | chTLR3-Allele24 | 0.45                 | KU235209                | PHb                  |
|                        | chTLR3-Allele25 | 0.90                 | KU235210                | SE                   |
| chTLR3-Var.12          | chTLR3-Allele26 | 2.26                 | KU235211, KU235212      | SI, TNNb             |
| chTLR3-Var.13          | chTLR3-Allele27 | 0.90                 | KU235213, KU235214      | BH, BHb              |
|                        | chTLR3-Allele28 | 0.45                 | KU235215                | BH                   |
| chTLR3-Var.14          | chTLR3-Allele29 | 1.36                 | KU235216                | TNNb                 |
| chTLR3-Var.15          | chTLR3-Allele30 | 0.90                 | KU235217                | AR                   |
| chTLR3-Var.16          | chTLR3-Allele31 | 0.90                 | KU235218                | FR                   |
| chTLR3-Var.17          | chTLR3-Allele32 | 0.45                 | KU235219                | GS                   |
| chTLR3-Var.18          | chTLR3-Allele33 | 0.45                 | KU235220                | GS                   |
| chTLR3-Var.19          | chTLR3-Allele34 | 0.45                 | KU235221                | CZ                   |
| chTLR3-Var.20          | chTLR3-Allele35 | 0.45                 | KU235222                | SI                   |
| chTLR3-Var.21          | chTLR3-Allele36 | 0.45                 | KU235223                | TNN                  |
| chTLR3-Var.22          | chTLR3-Allele37 | 0.45                 | KU235224                | TNNb                 |

| Protein variant | Allele          | Frequency (%) | GenBank Acc. No.         | Breed                                                        |
|-----------------|-----------------|---------------|--------------------------|--------------------------------------------------------------|
| chTLR4-Var.1    | chTLR4-Allele1  | 0.90          | KU235225, NM_001030693.1 | BAb, reference                                               |
|                 | chTLR4-Allele2  | 2.26          | KU235226, KU235227       | BHb, SE                                                      |
|                 | chTLR4-Allele3  | 3.62          | KU235228                 | CZ                                                           |
|                 | chTLR4-Allele4  | 0.90          | KU235229                 | CZ                                                           |
|                 | chTLR4-Allele5  | 0.45          | KU235230                 | PH                                                           |
|                 | chTLR4-Allele6  | 0.45          | KU235231                 | TNN                                                          |
|                 | chTLR4-Allele7  | 0.45          | KU235232                 | PAb                                                          |
| chTLR4-Var.2    | chTLR4-Allele8  | 0.45          | KU235233                 | A                                                            |
|                 | chTLR4-Allele9  | 19.46         | KU235234 - KU235247      | AR, BO, CZ, MA, MI, OL, PAb, PHb, POB, SE, SI, TNN, TNNb, YO |
|                 | chTLR4-Allele10 | 1.36          | KU235248, KU235249       | CZ, MI                                                       |
|                 | chTLR4-Allele11 | 0.45          | KU235250                 | SI                                                           |
|                 | chTLR4-Allele12 | 0.90          | KU235251                 | SE                                                           |
| chTLR4-Var.3    | chTLR4-Allele13 | 1.36          | KU235252                 | A                                                            |
|                 | chTLR4-Allele14 | 0.90          | KU235253, KU235254       | AR, GS                                                       |
|                 | chTLR4-Allele15 | 0.45          | KU235255                 | AR                                                           |
|                 | chTLR4-Allele16 | 4.52          | KU235256 - KU235258      | BHb, CZ, OL                                                  |
|                 | chTLR4-Allele17 | 0.45          | KU235259                 | GS                                                           |
|                 | chTLR4-Allele18 | 0.45          | KU235260                 | GS                                                           |
|                 | chTLR4-Allele19 | 0.90          | KU235261                 | CZ                                                           |
|                 | chTLR4-Allele20 | 0.45          | KU235262                 | CZ                                                           |
|                 | chTLR4-Allele21 | 0.45          | KU235263                 | CZ                                                           |

| <b>Protein variant</b> | <b>Allele</b>   | <b>Frequency (%)</b> | <b>GenBank Acc. No.</b> | <b>Breed</b>    |
|------------------------|-----------------|----------------------|-------------------------|-----------------|
|                        | chTLR4-Allele22 | 2.26                 | KU235264                | MA              |
| chTLR4-Var.4           | chTLR4-Allele23 | 6.79                 | KU235265, KU235266      | POb, RO         |
|                        | chTLR4-Allele24 | 4.52                 | KU235267 - KU235269     | LF, MI, TNNb    |
| chTLR4-Var.5           | chTLR4-Allele25 | 0.45                 | KU235270                | A               |
|                        | chTLR4-Allele26 | 4.07                 | KU235271, KU235272      | AR, BH          |
|                        | chTLR4-Allele27 | 0.90                 | KU235273                | AR              |
|                        | chTLR4-Allele28 | 0.90                 | KU235274, KU235275      | AR, TNNb        |
|                        | chTLR4-Allele29 | 0.45                 | KU235276                | AR              |
|                        | chTLR4-Allele30 | 0.90                 | KU235277                | BH              |
|                        | chTLR4-Allele31 | 1.81                 | KU235278                | BH              |
|                        | chTLR4-Allele32 | 0.45                 | KU235279                | TNN             |
| chTLR4-Var.6           | chTLR4-Allele33 | 2.26                 | KU235280 - KU235283     | AR, BH, SI, TNN |
|                        | chTLR4-Allele34 | 0.45                 | KU235284                | AR              |
|                        | chTLR4-Allele35 | 0.90                 | KU235285, KU235286      | CZ, GS          |
|                        | chTLR4-Allele36 | 0.45                 | KU235287                | LF              |
|                        | chTLR4-Allele37 | 1.81                 | KU235288                | LF              |
|                        | chTLR4-Allele38 | 0.45                 | KU235289                | MI              |
|                        | chTLR4-Allele39 | 0.45                 | KU235290                | SE              |
| chTLR4-Var.7           | chTLR4-Allele40 | 2.26                 | KU235291 - KU235293     | BH, CZ, TNN     |
|                        | chTLR4-Allele41 | 1.81                 | KU235294, KU235295      | BH, GS          |
|                        | chTLR4-Allele42 | 0.45                 | KU235296                | BHb             |

| Protein variant | Allele          | Frequency (%) | GenBank Acc. No.   | Breed   |
|-----------------|-----------------|---------------|--------------------|---------|
|                 | chTLR4-Allele43 | 0.90          | KU235297           | PHb     |
| chTLR4-Var.8    | chTLR4-Allele44 | 0.90          | KU235298, KU235299 | BAb, FR |
|                 | chTLR4-Allele45 | 0.90          | KU235300, KU235301 | BAb, CZ |
|                 | chTLR4-Allele46 | 1.81          | KU235302, KU235303 | BH, FR  |
| chTLR4-Var.9    | chTLR4-Allele47 | 2.26          | KU235304           | JA      |
|                 | chTLR4-Allele48 | 0.45          | KU235305           | JA      |
|                 | chTLR4-Allele49 | 0.45          | KU235306           | BO      |
| chTLR4-Var.10   | chTLR4-Allele50 | 0.45          | KU235307           | BAb     |
|                 | chTLR4-Allele51 | 2.26          | KU235308           | SI      |
| chTLR4-Var.11   | chTLR4-Allele52 | 0.90          | KU235309           | GS      |
|                 | chTLR4-Allele53 | 0.45          | KU235310           | PH      |
|                 | chTLR4-Allele54 | 0.45          | KU235311           | PH      |
| chTLR4-Var.12   | chTLR4-Allele55 | 0.90          | KU235312           | GS      |
|                 | chTLR4-Allele56 | 0.45          | KU235313           | JA      |
|                 | chTLR4-Allele57 | 0.45          | KU235314           | PE      |
| chTLR4-Var.13   | chTLR4-Allele58 | 1.81          | KU235315           | OL      |
| chTLR4-Var.14   | chTLR4-Allele59 | 0.90          | KU235316           | PH      |
|                 | chTLR4-Allele60 | 0.45          | KU235317           | PH      |
| chTLR4-Var.15   | chTLR4-Allele61 | 1.36          | KU235318, KU235319 | JA, YO  |
| chTLR4-Var.16   | chTLR4-Allele62 | 0.90          | KU235320, KU235321 | A, GS   |
| chTLR4-Var.17   | chTLR4-Allele63 | 0.90          | KU235322           | POb     |

| <b>Protein variant</b> | <b>Allele</b>   | <b>Frequency (%)</b> | <b>GenBank Acc. No.</b> | <b>Breed</b>                                                      |
|------------------------|-----------------|----------------------|-------------------------|-------------------------------------------------------------------|
| chTLR4-Var.18          | chTLR4-Allele64 | 0.45                 | KU235323                | AR                                                                |
| chTLR4-Var.19          | chTLR4-Allele65 | 0.45                 | KU235324                | AR                                                                |
| chTLR4-Var.20          | chTLR4-Allele66 | 0.45                 | KU235325                | AR                                                                |
| chTLR4-Var.21          | chTLR4-Allele67 | 0.45                 | KU235326                | BHb                                                               |
| chTLR4-Var.22          | chTLR4-Allele68 | 0.45                 | KU235327                | PE                                                                |
| chTLR4-Var.23          | chTLR4-Allele69 | 0.45                 | KU235328                | LF                                                                |
| chTLR4-Var.24          | chTLR4-Allele70 | 0.45                 | KU235329                | MI                                                                |
| chTLR5-Var.1           | chTLR5-Allele1  | 0.45                 | NM_001024586.1          | reference                                                         |
| chTLR5-Var.2           | chTLR5-Allele2  | 28.05                | KU235330 - KU235345     | A, AR, BAb, BH, CZ, GS, JA, LF, MA, OL, PE, PH, SI, TNN, TNNb, YO |
|                        | chTLR5-Allele3  | 5.43                 | KU235346                | AR                                                                |
|                        | chTLR5-Allele4  | 1.36                 | KU235347                | AR                                                                |
|                        | chTLR5-Allele5  | 0.45                 | KU235348                | BAb                                                               |
|                        | chTLR5-Allele6  | 10.86                | KU235349 - KU235355     | BH, BHb, CZ, MA, POB, SI, TNN                                     |
|                        | chTLR5-Allele7  | 11.76                | KU235356 - KU235363     | BH, BO, FR, GS, MI, RO, SI, TNN                                   |
|                        | chTLR5-Allele8  | 2.71                 | KU235364 - KU235367     | RO, JA, PHb, TNN                                                  |
|                        | chTLR5-Allele9  | 1.81                 | KU235368                | GS                                                                |
|                        | chTLR5-Allele10 | 0.45                 | KU235369                | CZ                                                                |
|                        | chTLR5-Allele11 | 1.36                 | KU235370 - KU235372     | CZ, SI, TNN                                                       |
| chTLR5-Var.3           | chTLR5-Allele12 | 18.10                | KU235373 - KU235381     | A, CZ, MA, MI, PAb, POB, SE, TNN, TNNb                            |
|                        | chTLR5-Allele13 | 0.45                 | KU235382                | BAb                                                               |
|                        | chTLR5-Allele14 | 0.90                 | KU235383, KU235384      | BAb, GS                                                           |

| Protein variant | Allele          | Frequency (%) | GenBank Acc. No.    | Breed                                                             |
|-----------------|-----------------|---------------|---------------------|-------------------------------------------------------------------|
|                 | chTLR5-Allele15 | 0.45          | KU235385            | CZ                                                                |
| chTLR5-Var.4    | chTLR5-Allele16 | 7.69          | KU235386 - KU235392 | BO, LF, OL, PAb, POB, RO, TNN                                     |
| chTLR5-Var.5    | chTLR5-Allele17 | 2.26          | KU235393            | JA                                                                |
| chTLR5-Var.6    | chTLR5-Allele18 | 1.81          | KU235394, KU235395  | LF, RO                                                            |
| chTLR5-Var.7    | chTLR5-Allele19 | 1.36          | KU235396, KU235397  | PH, PHb                                                           |
| chTLR5-Var.8    | chTLR5-Allele20 | 0.90          | KU235398, KU235399  | PE, POB                                                           |
| chTLR5-Var.9    | chTLR5-Allele21 | 0.45          | KU235400            | RO                                                                |
| chTLR5-Var.10   | chTLR5-Allele22 | 0.45          | KU235401            | RO                                                                |
| chTLR5-Var.11   | chTLR5-Allele23 | 0.45          | KU235402            | GS                                                                |
| chTLR7-Var.1    | chTLR7-Allele1  | 0.45          | NM001011688.1       | reference                                                         |
| chTLR7-Var.2    | chTLR7-Allele2  | 32.13         | KU235403 - KU235418 | A, AR, BAb, BH, CZ, FR, LF, MI, OL, PH, RO, RZ, SI, TNN, TNNb, YO |
| chTLR7-Var.3    | chTLR7-Allele3  | 8.60          | KU235419 - KU235427 | A, AR, BH, MA, OL, PE, POB, TNN, TNNb                             |
|                 | chTLR7-Allele4  | 0.45          | KU235428            | BHb                                                               |
|                 | chTLR7-Allele5  | 4.52          | KU235429 - KU235435 | FR, JA, PH, PHb, SI, TNNb, YO                                     |
|                 | chTLR7-Allele6  | 1.36          | KU235436            | JA                                                                |
| chTLR7-Var.4    | chTLR7-Allele7  | 11.76         | KU235437 - KU235442 | AR, LF, MA, PAb, POB, SE                                          |
|                 | chTLR7-Allele8  | 1.36          | KU235443 - KU235445 | GS, PAb, TNNb                                                     |
|                 | chTLR7-Allele9  | 0.45          | KU235446            | SI                                                                |
|                 | chTLR7-Allele10 | 0.45          | KU235447            | SI                                                                |
|                 | chTLR7-Allele11 | 0.45          | KU235448            | BO                                                                |
| chTLR7-Var.5    | chTLR7-Allele12 | 12.22         | KU235449 - KU235454 | BAb, CZ, JA, LF, MI, OL                                           |

| <b>Protein variant</b> | <b>Allele</b>   | <b>Frequency (%)</b> | <b>GenBank Acc. No.</b> | <b>Breed</b>              |
|------------------------|-----------------|----------------------|-------------------------|---------------------------|
|                        | chTLR7-Allele13 | 0.90                 | KU235455, KU235456      | BH, BHb                   |
|                        | chTLR7-Allele14 | 0.45                 | KU235457                | BHb                       |
|                        | chTLR7-Allele15 | 0.45                 | KU235458                | PHb                       |
|                        | chTLR7-Allele16 | 0.45                 | KU235459                | SI                        |
| chTLR7-Var.6           | chTLR7-Allele17 | 8.60                 | KU235460 - KU235463     | AR, BO, RO, TNNb          |
| chTLR7-Var.7           | chTLR7-Allele18 | 4.52                 | KU235464 - KU235469     | BAb, BH, BHb, PE, POb, RO |
|                        | chTLR7-Allele19 | 0.90                 | KU235470, KU235471      | BAb, BH                   |
|                        | chTLR7-Allele20 | 1.81                 | KU235472                | GS                        |
| chTLR7-Var.8           | chTLR7-Allele21 | 2.71                 | KU235473 - KU235478     | GS, LF, MI, PH, SE, YO    |
| chTLR7-Var.9           | chTLR7-Allele22 | 1.81                 | KU235479                | GS                        |
| chTLR7-Var.10          | chTLR7-Allele23 | 0.90                 | KU235480                | PHb                       |
| chTLR7-Var.11          | chTLR7-Allele24 | 0.90                 | KU235481                | MA                        |
| chTLR7-Var.12          | chTLR7-Allele25 | 0.45                 | KU235482                | AR                        |
| chTLR7-Var.13          | chTLR7-Allele26 | 0.45                 | KU235483                | SE                        |
| chTLR7-Var.14          | chTLR7-Allele27 | 0.45                 | KU235484                | SE                        |



**Table S5. List of chicken Toll-like receptor (TLR) protein variants with potentially convergent origins.**

| Gene      | Protein variant | Cluster A – Alleles          | Cluster B - Alleles | Min. distance A-B | Min. distance of any allele from A cluster to any allele(s) from other PrVar | Min. distance of any allele from B cluster to any allele(s) from other PrVar |
|-----------|-----------------|------------------------------|---------------------|-------------------|------------------------------------------------------------------------------|------------------------------------------------------------------------------|
| TLR4      | PrVar01         | A1, A3, A4, A5, A6           | A2, A7              | 4 SNVs            | 1 SNVs                                                                       | 2 SNVs                                                                       |
|           |                 |                              |                     | (A1↔A7)           | (A3↔A43)                                                                     | (A7↔A21)                                                                     |
|           | PrVar04         | A23                          | A24                 | 3 SNVs            | 1 SNVs                                                                       | 2 SNVs                                                                       |
|           |                 |                              |                     | (A23↔A24)         | (A23↔A68)                                                                    | (A24↔A36, A37)                                                               |
|           | PrVar06         | A33, A34, A35, A36, A37, A38 | A39                 | 3 SNVs            | 2 SNVs                                                                       | 2 SNVs                                                                       |
|           |                 |                              |                     | (A36↔A39)         | (A34↔A23, A57)                                                               | (A39↔A56)                                                                    |
|           | PrVar07         | A40, A42, A43                | A41                 | 3 SNVs            | 1 SNVs                                                                       | 2 SNVs                                                                       |
|           |                 |                              |                     | (A40↔A41)         | (A43↔A18)                                                                    | (A41↔A14, A15, A22)                                                          |
|           | PrVar08         | A44, A45                     | A46                 | 4 SNVs            | 2 SNVs                                                                       | 1 SNVs                                                                       |
|           |                 |                              |                     | (A44↔A46)         | (A44↔A21)                                                                    | (A46↔A14)                                                                    |
|           | PrVar10         | A50                          | A51                 | 3 SNVs            | 2 SNVs                                                                       | 2 SNVs                                                                       |
| (A50↔A51) |                 |                              |                     | (A50↔A41)         | (A51↔A62)                                                                    |                                                                              |
| PrVar11   | A52             | A53, A54                     | 4 SNVs              | 3 SNVs            | 2 SNVs                                                                       |                                                                              |
|           |                 |                              | (A52↔A53, A54)      | (A52↔A60)         | (A54↔A37, A59)                                                               |                                                                              |
| TLR7      | PrVar03         | A3, A4, A6                   | A5                  | 5 SNVs            | 1 SNVs                                                                       | 1 SNVs                                                                       |
|           |                 |                              |                     | (A3↔A5)           | (A3↔A9, A4↔A15)                                                              | (A5↔A14)                                                                     |
|           | PrVar05         | A12, A13, A15                | A14, A16            | 3 SNVs            | 1 SNVs                                                                       | 2 SNVs                                                                       |
|           |                 |                              |                     | (A12↔A16)         | (A12↔A2, A15↔A4)                                                             | (A16↔A20)                                                                    |

## Supplementary Methods

### Genetic analysis of chicken Toll-like receptors (*chTLRs*) and Hypervariable segment I (HVS-I)

All polymerase chain reactions (PCR; total volume 10-25  $\mu$ L) were carried out using the Multiplex PCR Master Mix kit (Qiagen) in accordance with the manufacturer's instructions, with modifications for particular primer-pairs (see Supplementary Methods Table M1). Complete coding DNA sequences (CDSs) of *chTLRs* were amplified and/or sequenced using primers designed according to reference sequences retrieved from NCBI GenBank (IDs: *chTLR3* - NM\_001011691.3, *chTLR4* - NM\_001030693.1, *chTLR5* - NM\_001024586.1, *chTLR7* - NM\_001011688.2). List of used primers with their sequences is provided in Supplementary Methods Table M2 and their localisation is visualised in Supplementary Methods Fig. M1. HVS-I was amplified and sequenced using the previously published primers L16750 (5'- AGGACTACGGCTTGAAAAGC -3')<sup>7</sup> and H522 (5'- ATGTGCCTGACCGAGGAACCAG -3')<sup>8</sup>. PCR products were enzymatically purified with Exonuclease I (New England Biolabs) and Calf Intestinal Alkaline Phosphatase (New England Biolabs) before commercial Sanger sequencing at GATC Biotech (Germany). All sequences were assembled and manually checked in SeqScape v. 2.5 (Applied Biosystems) and aligned in BioEdit v. 7.2.5 using the ClustalW Multiple alignment tool with default settings. No indels were detected in the alignments. The FaBox online toolbox<sup>9</sup> was used to extract all single nucleotide variants (SNVs) from the alignments. Individual-allelic sequences were resolved using the PHASE algorithm implemented in DnaSP v. 5.10.01<sup>10</sup>. This was possible in part because of the high frequency of homozygotes in our dataset, i.e. 14 alleles of *chTLR3* (37.8 %), 19 alleles of *chTLR4* (27.1 %), 10 alleles of *chTLR5* (43.5 %) and 10 alleles of *chTLR7* (37 %). Presence of these alleles allowed identification of the

pairing alleles in heterozygotes. Sequences of alleles in heterozygotes that could not be reliably resolved based on this approach were verified by cloning using the CloneJet kit (Thermo Scientific) with pGEM-T vector (Promega) and JM109 High Efficiency Competent Cells (Promega). At least two different positive clones were sequenced in each case.

## **Genetic analysis of human Toll-like receptors (*hTLRs*) and HVS-I**

The genome ranges of interest according to the GRCh37.p13 Primary Assembly were 4:186997774-186998214, 4:186999994-187000185, 4:187003474-187005326 and 4:187005799-187006027 for hTLR3, 9:120466751-120466843, 9:120470841-120471007 and 9:120474667-120476926 on for hTLR4, 1:223286373-223283797 for hTLR5, X:12885698-12885800 and X:12903631-12906777 for hTLR7 and 16023-16548 of mitochondrial DNA for partial HVS-I, with length corresponding to the mitochondrial sequence used in chickens.

## **Classification of amino acid substitutions**

Amino acids were grouped into five categories based on the physicochemical properties of their side chains, i.e. amino acids with hydrophobic (A, F, G, I, L, M, V, W, Y), polar uncharged (N, Q, S, T), polar positively charged (H, K, R) and polar negatively charged (D, E) side chains, and special cases (C, P). Substitutions of amino acids within groups were considered as conservative, and those between groups as radical.

## **Microsatellites in chickens**

Nineteen unlinked microsatellite loci (ADL20, ADL112, ADL123, ADL142, ADL191, ADL247, ADL262, ADL306, ADL315, COL1A1, LEI64, LEI120, MCW5, MCW83, MCW178, MCW217, MCW219, MCW230 and ROS302) located on 14 different chromosomes were amplified in three multiplex PCRs using the Type-it Microsatellite PCR Kit (Qiagen). A 6 µl reaction volume was used

under the following cycling conditions: initial denaturation at 95°C for 5 minutes, 30 cycles of 95°C for 30 s, 57°C for 90 s, 72°C for 60 s and a final extension at 60°C for 30 minutes with specific primers, of which one was fluorescently labelled (details in Supplementary Methods Table M3). Subsequently, 1 µl of PCR product was mixed with 9 µl of formamide and 0.3 µl GeneScan 500 LIZ dye size standard (Applied Biosystems). This was denatured by heating at 95 °C for 2 minutes and analysed on an Applied Biosystems 3130xl Genetic Analyser. Fragment sizes were determined using GeneMarker software (SoftGenetics). Approximately 0.72 % of all data were missing.

## **Population structure**

Genetic population structure was examined based on the Bayesian clustering approach implemented in STRUCTURE v. 2.3.4<sup>11</sup> with the admixture model, with separate runs for the alleles of TLRs and Neutral markers. We performed 10 independent runs for each K value (ranging from 1 to 25). Each run included 500 000 iterations following a burn-in period of 100 000 iterations. Delta K was calculated in Structure Harvester<sup>12</sup>, as described by Evanno et al.<sup>13</sup>. Independent replications for particular K values were combined in CLUMPP<sup>14</sup> and visualised in Distruct<sup>15</sup>.

## Supplementary Methods Figures

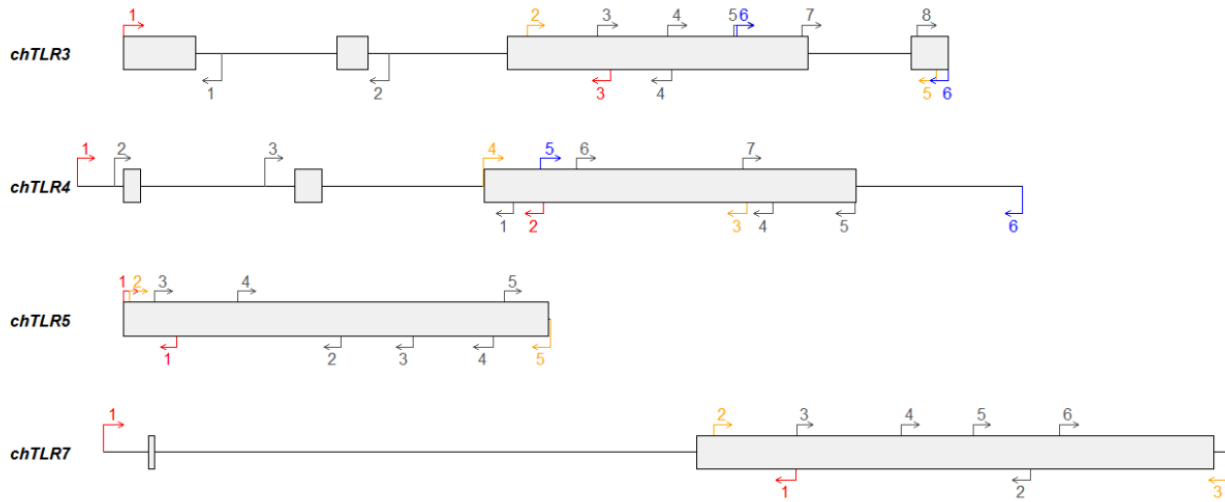

**Figure M1. Localisation of primers used in this study.** Coding sequences for chicken Toll-like receptors (chTLRs) are displayed as grey boxes; amplification primers are indicated in red, orange or blue (matching primer pairs in the same colour); and primers used for sequencing only in grey. Forward primers lie above the line and reverse primers below. Numbering of the primers corresponds with Supplementary Methods Table M2.

## Supplementary Methods Tables

**Table M1. Polymerase chain reaction (PCR) conditions used for particular chicken *Toll-like receptor (TLR)* PCR products.**

| Gene        | Segment | F primer     | R primer     | Product length (bp) | Concentration of primers ( $\mu$ M) | Annealing time (s) | Annealing temperature ( $^{\circ}$ C) | Elongation time (s) | Number of cycles |
|-------------|---------|--------------|--------------|---------------------|-------------------------------------|--------------------|---------------------------------------|---------------------|------------------|
| <i>TLR3</i> | 1       | chTLR3_F1-A1 | chTLR3_R3-A1 | 2959                | 0.2                                 | 40                 | 62                                    | 150                 | 35               |
| <i>TLR3</i> | 2       | chTLR3_F2-A2 | chTLR3_R5-A2 | 2481                | 0.3                                 | 40                 | 61                                    | 180                 | 35               |
| <i>TLR3</i> | 3       | chTLR3_F6-A3 | chTLR3_R6-A3 | 1288                | 0.3                                 | 60                 | 58                                    | 150                 | 35               |
| <i>TLR4</i> | 1       | chTLR4_F1-A1 | chTLR4_R2-A1 | 2830                | 0.3                                 | 30                 | 61                                    | 150                 | 35               |
| <i>TLR4</i> | 2       | chTLR4_F4-A2 | chTLR4_R3-A2 | 1601                | 0.3                                 | 40                 | 60                                    | 100                 | 35               |
| <i>TLR4</i> | 3       | chTLR4_F5-A3 | chTLR4_R6-A3 | 2927                | 0.2                                 | 30                 | 62                                    | 150                 | 33               |
| <i>TLR5</i> | 1       | chTLR5_F1-A1 | chTLR5_R1-A1 | 327                 | 0.3                                 | 60                 | 56                                    | 30                  | 35               |
| <i>TLR5</i> | 2       | chTLR5_F2-A2 | chTLR5_R5-A2 | 2554                | 0.3                                 | 60                 | 62                                    | 150                 | 35               |
| <i>TLR7</i> | 1       | chTLR7_F1-A1 | chTLR7_R1-A1 | 4207                | 0.3                                 | 40                 | 62                                    | 240                 | 38               |
| <i>TLR7</i> | 2       | chTLR7_F2-A2 | chTLR7_R3-A2 | 3122                | 0.3                                 | 40                 | 61                                    | 150                 | 38               |
| HVS-I       |         | L16750       | H522         | 525                 | 0.3                                 | 45                 | 60                                    | 60                  | 35               |

**Table M2. Primers used for polymerase chain reaction amplification (A) and sequencing (S) of selected chicken *Toll-like receptors (TLRs)*. Position reported in bp from the start codon.**

| Gene        | Name         | Sequence (5' – 3')        | Orientation | Position (bp) | Use | Segment |
|-------------|--------------|---------------------------|-------------|---------------|-----|---------|
| <i>TLR3</i> | chTLR3_F1-A1 | ATGGGATGCTCTATTCCTTGCTGGA | Forward     | 1             | A   | 1       |
| <i>TLR3</i> | chTLR3_R1    | CTGACATAATAAGCCACTAGGCC   | Reverse     | 598           | S   | 1       |
| <i>TLR3</i> | chTLR3_R2    | GCAGGCTTGATCTTGATAGATGC   | Reverse     | 1616          | S   | 1       |
| <i>TLR3</i> | chTLR3_F2-A2 | CTCACTGAGCCATGTGAAGC      | Forward     | 2459          | A   | 2       |
| <i>TLR3</i> | chTLR3_F3    | GCTAATCCAGCTTGCAAGTTCTC   | Forward     | 2886          | S   | 2       |
| <i>TLR3</i> | chTLR3_R3-A1 | GGAGGAAAATGCCCACTTTC      | Reverse     | 2960          | A+S | 1       |
| <i>TLR3</i> | chTLR3_F4    | TTGGAAATGTGCAAACCCAGGAGG  | Forward     | 3308          | S   | 2       |
| <i>TLR3</i> | chTLR3_R4    | AGGTCCTCCTGGGTTTGACATTT   | Reverse     | 3335          | S   | 2       |
| <i>TLR3</i> | chTLR3_F5    | CCTAAATATCACGGTACTCTGG    | Forward     | 3714          | S   | 2       |
| <i>TLR3</i> | chTLR3_F6-A3 | GTACTCTGGTGTTCATTTTG      | Forward     | 3727          | A   | 3       |
| <i>TLR3</i> | chTLR3_F7    | GTGACTGAACATCTCTACAGGA    | Forward     | 4125          | S   | 3       |
| <i>TLR3</i> | chTLR3_F8    | GTCGAGACTCCATCATACTGATC   | Forward     | 4828          | S   | 3       |
| <i>TLR3</i> | chTLR3_R5-A2 | TGGCCAGTCAAGATGCAGC       | Reverse     | 4940          | A+S | 2       |
| <i>TLR3</i> | chTLR3_R6-A3 | TCAGCGCACTTTACTATTAGTT    | Reverse     | 5015          | A+S | 3       |
| <i>TLR4</i> | chTLR4_F1-A1 | GGCATTCAAGTGACATCACAC     | Forward     | -276          | A   | 1       |
| <i>TLR4</i> | chTLR4_F2    | GTCCTTGCTCCGCATCCC        | Forward     | -50           | S   | 1       |
| <i>TLR4</i> | chTLR4_F3    | GGTCCTATTAGAAGCAGGACAG    | Forward     | 861           | S   | 1       |

| Gene        | Name         | Sequence (5' – 3')        | Orientation | Position (bp) | Use | Segment |
|-------------|--------------|---------------------------|-------------|---------------|-----|---------|
| <b>TLR4</b> | chTLR4_F4-A2 | GGTGCCACCTCCATACAATAGAAG  | Forward     | 2192          | A+S | 2       |
| <b>TLR4</b> | chTLR4_R1    | GATGGGTAGGTCAGACAGAG      | Reverse     | 2370          | S   | 1       |
| <b>TLR4</b> | chTLR4_F5-A3 | AGGCTCAACCTCACGTTGGTACTT  | Forward     | 2539          | A+S | 3       |
| <b>TLR4</b> | chTLR4_R2-A1 | ACGTGAGGTTGAGCCTGTTTGT    | Reverse     | 2554          | A   | 1       |
| <b>TLR4</b> | chTLR4_F6    | CTCTTGAGTGGACTGTGTCAGG    | Forward     | 2758          | S   | 2       |
| <b>TLR4</b> | chTLR4_F7    | GATATGCCACACACCTGCCTAC    | Forward     | 3768          | S   | 3       |
| <b>TLR4</b> | chTLR4_R3-A2 | TCATGTAGGCAGGTGTGTGGCATA  | Reverse     | 3793          | A   | 2       |
| <b>TLR4</b> | chTLR4_R4    | CACTGAGCAGCACCAATGAGTAG   | Reverse     | 3949          | S   | 3       |
| <b>TLR4</b> | chTLR4_R5    | GAGTTTTATCTCCTCGTGATTCC   | Reverse     | 4446          | S   | 3       |
| <b>TLR4</b> | chTLR4_R6-A3 | GCAAGCAAACACAGCATCCAG     | Reverse     | 5466          | A+S | 3       |
| <b>TLR5</b> | chTLR5_F1-A1 | ATGATGTTACATCAACGGC       | Forward     | 1             | A   | 1       |
| <b>TLR5</b> | chTLR5_F2-A2 | CACTAGCTGGAGATATATGTGC    | Forward     | 41            | A   | 2       |
| <b>TLR5</b> | chTLR5_F3    | GCAACTTCATTTCCACTGCTGG    | Forward     | 190           | S   | 2       |
| <b>TLR5</b> | chTLR5_R1-A1 | GAATGTTATTGAACCCAGG       | Reverse     | 328           | A+S | 1       |
| <b>TLR5</b> | chTLR5_F4    | GGACGTTAGTGAGAATGGCTGG    | Forward     | 699           | S   | 2       |
| <b>TLR5</b> | chTLR5_R2    | GGTCACCCAGATTTGCGAGCC     | Reverse     | 1327          | S   | 2       |
| <b>TLR5</b> | chTLR5_R3    | GCACAGTCACAGACATACTTG     | Reverse     | 1763          | S   | 2       |
| <b>TLR5</b> | chTLR5_R4    | CCAAATGGCATCACGAATATTGTTG | Reverse     | 2253          | S   | 2       |
| <b>TLR5</b> | chTLR5_F5    | GCCTTTAATTTGCCAGAGC       | Forward     | 2317          | S   | 2       |
| <b>TLR5</b> | chTLR5_R5-A2 | CATCAACTGTCAGTGTGAGAC     | Reverse     | 2595          | A+S | 2       |
| <b>TLR7</b> | chTLR7_F1-A1 | AAAGCAGTGGTTGCTGCTGTTGTC  | Forward     | -117          | A+S | 1       |
| <b>TLR7</b> | chTLR7_F2-A2 | TTGTGGAGATTGACTTCAGGTG    | Forward     | 3588          | A+S | 2       |
| <b>TLR7</b> | chTLR7_R1-A1 | GCCACTGAGATCAAGAATTTCTAGG | Reverse     | 4090          | A+S | 1       |
| <b>TLR7</b> | chTLR7_F3    | TGCCACGTTGCTATAACGC       | Forward     | 4094          | S   | 2       |
| <b>TLR7</b> | chTLR7_F4    | GGTCGAAGTTGCAAGTCAAAG     | Forward     | 4730          | S   | 2       |
| <b>TLR7</b> | chTLR7_F5    | GATGGAAAGCCAATCTCTCA      | Forward     | 5167          | S   | 2       |
| <b>TLR7</b> | chTLR7_R2    | CGGAGTATCAGTTCTTGGAGAG    | Reverse     | 5514          | S   | 2       |
| <b>TLR7</b> | chTLR7_F6    | GTGATGCAGTATGGTTTGTGGG    | Forward     | 5688          | S   | 2       |
| <b>TLR7</b> | chTLR7_R3-A2 | GCTGCAAATGCTGAATGAGGTG    | Reverse     | 6710          | A+S | 2       |

**Table M3. Overview of microsatellite markeres used in chickens.** Chr: chromosome, MPLX: multiplex membership

| Marker  | Chr | F primer sequence (5' – 3') | R primer sequence (5' – 3')  | MPL X | Fluoro phore | Length range (bp) |
|---------|-----|-----------------------------|------------------------------|-------|--------------|-------------------|
| ADL0020 | 1   | TAGATAAAAATCCTTCCCTT        | GCACTCAAAGAAAACAAAT          | 2     | PET          | 97 - 112          |
| ADL0112 | 10  | ATCTCAAATGTAATGCGTGC        | GGCTTAAGCTGACCCATTAT         | 1     | VIC          | 123 - 132         |
| ADL0123 | 11  | GCTGTGTCAAGATTAGAATCAC      | AACAATGAAAAACACTACCT<br>GA   | 2     | VIC          | 102 - 141         |
| ADL0142 | 6   | CAGCCAATAGGGATAAAAGC        | CTGTAGATGCCAAGGAGTGC         | 1     | 6-FAM        | 227 - 237         |
| ADL0191 | 9   | AAAGGAAAGCCTATGTGAAT        | AAAGCACCAAGCGAGATACA         | 2     | 6-FAM        | 133 - 143         |
| ADL0247 | 5   | CTCTTGTGTCTGTCTTGTG         | TGCATGTTGTCAGTTTTTCAG        | 3     | VIC          | 163 - 170         |
| ADL0262 | 23  | GTGCAGACACAGAGGGAAAG        | TCACATGCACACAGAGATGC         | 2     | 6-FAM        | 100 - 107         |
| ADL0306 | 3   | GTTACTGTATCTTGGCTCAT        | TCAGTTTGACTTTCCTTCAT         | 3     | NED          | 115 - 133         |
| ADL0315 | 7   | TCCTTGGGCAGTAGTTTCAA        | CTCCCATGTTGCTTCTTTAG         | 3     | 6-FAM        | 245 - 249         |
| COL1A1  | 27  | CGGACCATGAATTTGGCATT        | TACTCTCTCTGTCACGCG           | 1     | NED          | 112 - 118         |
| LEI0064 | 7   | TGGTTGTCTCAATACAACGTC       | CTGTAAAGATTTCTCAGAAAC<br>AG  | 3     | PET          | 285 - 307         |
| LEI0120 | 15  | CGTAACACATGCAACTCAATG       | TTAGAATGAAAAGGCTGTTCC        | 2     | VIC          | 274 - 316         |
| MCW0005 | 4   | ACCTCCTGCTGGCAAATAAATTGC    | TCACTTTAGCTCCATCAGGAT<br>TCA | 1     | VIC          | 210 - 253         |
| MCW0083 | 3   | GCCTTTCACCCATCTTACTGT       | TACATTTCAGAAGGAATGTTG<br>C   | 1     | PET          | 83 - 92           |
| MCW0178 | 7   | ACTGGAATTTTAGGGCAACAG       | AACTGTTAGCTAATATGACCT<br>G   | 1     | NED          | 71 - 93           |
| MCW0217 | 18  | GATCTTCTGGAACAGATTTT        | CTGCACTTGTTTCAGGTTCTG        | 1     | PET          | 147 - 175         |
| MCW0219 | 18  | CCACAGCTATAAATGCTATAGC      | GACATGACTTACTGAAAATA<br>G    | 3     | NED          | 222 - 239         |
| MCW0230 | 11  | TGCACAGAGCCAAGCTGCTTC       | GATCCTCTGATGGCTGCCG          | 1     | NED          | 260 - 298         |
| ROS0302 | 24  | CACAGACACCCCGTACAG          | ACACAGCGGTTGGTTATGCC         | 1     | VIC          | 96 - 111          |



## References

1. Petersen, T. N., Brunak, S., von Heijne, G. & Nielsen, H. SignalP 4.0: discriminating signal peptides from transmembrane regions. *Nat. Methods* **8**, 785–786 (2011).
2. Krzywinski, M. *et al.* Circos: An information aesthetic for comparative genomics. *Genome Res.* **19**, 1639–1645 (2009).
3. Downing, T., Lloyd, A. T., O’Farrelly, C. & Bradley, D. G. The Differential Evolutionary Dynamics of Avian Cytokine and TLR Gene Classes. *J. Immunol.* **184**, 6993–7000 (2010).
4. Ruan, W., An, J. & Wu, Y. Polymorphisms of Chicken TLR3 and 7 in Different Breeds. *PLoS ONE* **10**, e0119967 (2015).
5. Ruan, W. K., Wu, Y. H., An, J. & Zheng, S. J. Polymorphisms of chicken Toll-like receptors 4, 15, and 21 in different breeds. *Poult. Sci.* **91**, 2512–2516 (2012).
6. Ruan, W., Wu, Y. & Zheng, S. J. Different genetic patterns in avian Toll-like receptor (TLR)5 genes. *Mol. Biol. Rep.* **39**, 3419–3426 (2012).
7. Fumihito, A. *et al.* One subspecies of the red junglefowl (*Gallus gallus gallus*) suffices as the matriarchic ancestor of all domestic breeds. *Proc. Natl. Acad. Sci. U. S. A.* **91**, 12505–12509 (1994).
8. Liu, Y.-P. *et al.* Multiple maternal origins of chickens: out of the Asian jungles. *Mol. Phylogenet. Evol.* **38**, 12–19 (2006).
9. Villesen, P. FaBox: an online toolbox for fasta sequences. *Mol. Ecol. Notes* **7**, 965–968 (2007).
10. Librado, P. & Rozas, J. DnaSP v5: a software for comprehensive analysis of DNA polymorphism data. *Bioinforma. Oxf. Engl.* **25**, 1451–2 (2009).
11. Pritchard, J. K., Stephens, M. & Donnelly, P. Inference of Population Structure Using Multilocus Genotype Data. *Genetics* **155**, 945–959 (2000).

12. Earl, D. A. & vonHoldt, B. M. STRUCTURE HARVESTER: a website and program for visualizing STRUCTURE output and implementing the Evanno method. *Conserv. Genet. Resour.* **4**, 359–361 (2011).
13. Evanno, G., Regnaut, S. & Goudet, J. Detecting the number of clusters of individuals using the software STRUCTURE: a simulation study. *Mol. Ecol.* **14**, 2611–2620 (2005).
14. Jakobsson, M. & Rosenberg, N. A. CLUMPP: a cluster matching and permutation program for dealing with label switching and multimodality in analysis of population structure. *Bioinformatics* **23**, 1801–1806 (2007).
15. Rosenberg, N. A. DISTRUCT: a program for the graphical display of population structure. *Mol. Ecol. Notes* **4**, 137–138 (2004).
